# Supplementary material for: Association between biomarkers and COVID-19 severity and mortality: a nationwide Danish cohort study
Source: PubMed Central journal article supplement — BMJ Open. 2020 Dec 2;10(12):e041295. doi: 10.1136/bmjopen-2020-041295 (PMC7712929; doi:10.1136/bmjopen-2020-041295), 2020-12-02
Supplement: bmjopen-2020-041295.draft_revisions.pdf [file bmjopen-2020-041295.draft_revisions.pdf]

# BMJ Open

BMJ Open is committed to open peer review. As part of this commitment we make the peer review history of every article we publish publicly available.

When an article is published we post the peer reviewers' comments and the authors' responses online. We also post the versions of the paper that were used during peer review. These are the versions that the peer review comments apply to.

The versions of the paper that follow are the versions that were submitted during the peer review process. They are not the versions of record or the final published versions. They should not be cited or distributed as the published version of this manuscript.

BMJ Open is an open access journal and the full, final, typeset and author-corrected version of record of the manuscript is available on our site with no access controls, subscription charges or pay-per-view fees (<http://bmjopen.bmj.com>).

If you have any questions on BMJ Open's open peer review process please email [info.bmjopen@bmj.com](mailto:info.bmjopen@bmj.com)

# BMJ Open

## Association between Biomarkers and COVID-19 Severity and Mortality: A Nationwide Danish Cohort Study

|                               |                                                                                                                                                                                                                                                                                                                                                                                                                                                                                                                                                                                                                                                                                                                                                                     |
|-------------------------------|---------------------------------------------------------------------------------------------------------------------------------------------------------------------------------------------------------------------------------------------------------------------------------------------------------------------------------------------------------------------------------------------------------------------------------------------------------------------------------------------------------------------------------------------------------------------------------------------------------------------------------------------------------------------------------------------------------------------------------------------------------------------|
| Journal:                      | <i>BMJ Open</i>                                                                                                                                                                                                                                                                                                                                                                                                                                                                                                                                                                                                                                                                                                                                                     |
| Manuscript ID                 | bmjopen-2020-041295                                                                                                                                                                                                                                                                                                                                                                                                                                                                                                                                                                                                                                                                                                                                                 |
| Article Type:                 | Original research                                                                                                                                                                                                                                                                                                                                                                                                                                                                                                                                                                                                                                                                                                                                                   |
| Date Submitted by the Author: | 06-Jun-2020                                                                                                                                                                                                                                                                                                                                                                                                                                                                                                                                                                                                                                                                                                                                                         |
| Complete List of Authors:     | Hodges, Gethin; Copenhagen University Hospital Herlev and Gentofte, ; Herlev Hospital<br>Pallisgaard, Jannik; University of Copenhagen<br>Schjerning Olsen, Anne-Marie; University Hospital Gentofte, Hellerup, Denmark<br>McGettigan, Patricia; Queen Mary University of London,<br>Andersen, Mikkel; Aalborg University Hospital, Unit of Clinical Biostatistics and Epidemiology & Department of Cardiology<br>Krogager, Maria; Aalborg University<br>Kragholm, Kristian; Aalborg University Hospital, Unit of Epidemiology and Biostatistics<br>Køber, Lars; Rigshospitalet, Department of Cardiology<br>Gislason, Gunnar<br>Torp-Pedersen, Christian; Nordsjællands Hospital, Department of Clinical Investigation and Cardiology<br>Bang, Casper N.; Rigshosp |
| Keywords:                     | GENERAL MEDICINE (see Internal Medicine), INFECTIOUS DISEASES, Adult intensive & critical care < INTENSIVE & CRITICAL CARE                                                                                                                                                                                                                                                                                                                                                                                                                                                                                                                                                                                                                                          |
|                               |                                                                                                                                                                                                                                                                                                                                                                                                                                                                                                                                                                                                                                                                                                                                                                     |

SCHOLARONE™  
Manuscripts

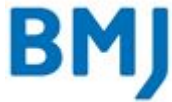

I, the Submitting Author has the right to grant and does grant on behalf of all authors of the Work (as defined in the below author licence), an exclusive licence and/or a non-exclusive licence for contributions from authors who are: i) UK Crown employees; ii) where BMJ has agreed a CC-BY licence shall apply, and/or iii) in accordance with the terms applicable for US Federal Government officers or employees acting as part of their official duties; on a worldwide, perpetual, irrevocable, royalty-free basis to BMJ Publishing Group Ltd ("BMJ") its licensees and where the relevant Journal is co-owned by BMJ to the co-owners of the Journal, to publish the Work in this journal and any other BMJ products and to exploit all rights, as set out in our [licence](#).

The Submitting Author accepts and understands that any supply made under these terms is made by BMJ to the Submitting Author unless you are acting as an employee on behalf of your employer or a postgraduate student of an affiliated institution which is paying any applicable article publishing charge ("APC") for Open Access articles. Where the Submitting Author wishes to make the Work available on an Open Access basis (and intends to pay the relevant APC), the terms of reuse of such Open Access shall be governed by a Creative Commons licence – details of these licences and which [Creative Commons](#) licence will apply to this Work are set out in our licence referred to above.

Other than as permitted in any relevant BMJ Author's Self Archiving Policies, I confirm this Work has not been accepted for publication elsewhere, is not being considered for publication elsewhere and does not duplicate material already published. I confirm all authors consent to publication of this Work and authorise the granting of this licence.

1  
2  
3 **Association between Biomarkers and COVID-19 Severity and**  
4  
5  
6 **Mortality: A Nationwide Danish Cohort Study**  
7

8 Gethin Hodges, MBBS, Ph.D.<sup>a</sup>

9 Jannik Pallisgaard, MD, Ph.D.<sup>a</sup>

10 Anne-Marie Schjerning, MD, Ph.D.<sup>b, c</sup>

11 Patricia McGettigan, MD.<sup>d</sup>

12 Mikkel P. Andersen, MSPH, Ph.D.<sup>e</sup>

13 Maria L. Krogager, MD.<sup>f</sup>

14 Kristian Kragholm, MD, Ph.D.<sup>g</sup>

15 Lars Køber, MD, DMCs.<sup>h</sup>

16 Gunnar H. Gislason, MD, Ph.D.<sup>a, c</sup>

17 Christian Torp-Pedersen, MD, DMCs.<sup>i</sup>

18 Casper N. Bang, MD, Ph.D.<sup>c, i</sup>

19  
20  
21  
22  
23  
24  
25  
26  
27  
28  
29  
30  
31  
32  
33  
34 *a) Department of Cardiology, Copenhagen University Hospital Herlev and Gentofte,*  
35 *Copenhagen, Denmark*

36  
37  
38 *b) Department of Cardiology, Zealand University Hospital, Roskilde, Denmark*

39  
40  
41 *c) The Danish Heart Foundation, Copenhagen, Denmark*

42  
43  
44  
45 *d) William Harvey Research Institute, Barts and the London School of Medicine and Dentistry,*  
46 *Queen Mary University of London, United Kingdom*

47  
48  
49  
50 *e) Unit of Clinical Biostatistics and Epidemiology & Department of Cardiology, Aalborg*  
51 *University Hospital, Denmark*

52  
53  
54  
55 *f) Department of Cardiology, Aalborg University Hospital, Aalborg, Denmark; Unit of*  
56 *Epidemiology and Biostatistics, Aalborg University Hospital, Aalborg, Denmark.*

1  
2  
3  
4  
5  
6 *g) Department of Clinical Research, Nordsjaellands, Hospital, Hillerød, Denmark*

7  
8 *h) The Heart Centre, Rigshospitalet, University of Copenhagen, Copenhagen, Denmark.*

9  
10 *i) Department of Cardiology, North Zealand University Hospital, Hillerød, Denmark*

11  
12 Correspondence to: Dr. Gethin Hodges, Herlev Hospital, Herlev Ringvej 75

13  
14 2730 Herlev, Copenhagen, Denmark.

15  
16 Fax: +45 3867 7654. Phone: +45 3868 3868.

17  
18 E-mail: [gethin.william.hodges@regionh.dk](mailto:gethin.william.hodges@regionh.dk)

19  
20  
21 Word count: 6158

## Abstract

**Objective:** To evaluate the association between common biomarkers, death and ICU admission in patients with COVID-19.

**Design:** Retrospective cohort study. From electronic national registry data, we used Cox analysis and bootstrapping to evaluate associations between baseline levels of biomarkers and standardized absolute risks of death/ICU admission, adjusted for age and gender.

**Setting:** All hospitals in Denmark.

**Participants:** 1310 patients aged  $\geq 18$  years admitted to hospital with COVID-19 from February 27<sup>th</sup> to May 1<sup>st</sup>, 2020, with available biochemistry data.

**Main outcome measures:** A composite of death / ICU admission occurring within 30-days.

**Results:** Of the 1310 patients admitted to hospital (54.6% male; median age 73.6), 352 (26.9%) experienced the composite endpoint and 263 (20.1%) died. For the composite endpoint, the absolute risks for moderately and severely elevated C-reactive protein (CRP) were significantly higher, 21.5% and 39.2% respectively, compared to 5.0% for those with normal CRP.

Moderately and severely elevated leucocytes were significantly higher, 34.5% and 46.6% risk respectively, compared to 23.2% for those with normal leucocytes. Moderately and severely decreased estimated glomerular filtration rate (eGFR) were significantly higher, 41.5% and 45.9% risk respectively, compared to 30.4% for those with normal/mildly decreased eGFR.

Normal and elevated urea were significantly higher, 22.3% and 40.6% risk respectively, compared to 7.3% for those with low urea. Elevated D-dimer was significantly higher, 31.8% risk, compared to 17.5% for those with normal D-dimer. Moderately and severely elevated troponins were significantly higher, 27.7% and 57.3% risk respectively, compared to 9.4% for

1  
2  
3 those with normal troponin. Elevated procalcitonin was significantly higher, 52.1% risk,  
4 compared to 28.0% for those with normal procalcitonin.  
5  
6

7 **Conclusion:** In this nationwide study of patients admitted with COVID-19, elevated levels of  
8 CRP, leucocytes, procalcitonin, urea, troponins and D-dimer, and low levels of eGFR were  
9 associated with higher standardized absolute risk of death/ICU admission within 30 days.  
10  
11  
12  
13  
14  
15

### 16 **Strengths and limitations of this study**

- 17 • Much of the research concerning COVID-19 describes small case studies from China and  
18 Italy, without clearly defined outcomes.
- 19 • This study is the first to report the standardized absolute risk of individual laboratory tests  
20 on short-term mortality and ICU admission in a relatively large, European cohort of 1310  
21 patients with COVID-19.
- 22 • Our study can help the clinician to understand which biomarkers are important in  
23 identifying patients with poor prognosis, which may be useful to assess disease severity  
24 or to enable early intervention.
- 25 • The main limitation of our study is its observational, non-randomized design.
- 26 • This study included only patients admitted to the hospital with COVID-19 and measured  
27 biochemical data, hence it is likely to represent symptomatic patients at the more severe  
28 end of the disease spectrum.  
29  
30  
31  
32  
33  
34  
35  
36  
37  
38  
39  
40  
41  
42  
43  
44  
45  
46  
47  
48  
49  
50  
51  
52  
53  
54  
55  
56  
57  
58  
59  
60

## Introduction

Coronavirus disease 2019 (COVID-19) caused by the novel coronavirus, severe acute respiratory syndrome coronavirus-2 (SARS-CoV-2), has spread rapidly to become a worldwide pandemic resulting in an enormous strain on healthcare systems globally. As of May 10<sup>th</sup>, 2020, the number of confirmed cases has surpassed 4.1 million, affecting 212 countries, although the actual number is likely to be much higher.<sup>1</sup> The clinical course of COVID-19 is variable, but is typically characterized by an initial phase with fever or mild upper respiratory symptoms (though many are asymptomatic). Among hospitalized patients, those with a poor prognosis tend to develop severe viral pneumonia requiring ventilatory support and intensive care unit (ICU) admission.<sup>2</sup> Despite supportive care, a high proportion of patients with COVID-19 suffer rapid deterioration with respiratory failure and death.<sup>3-5</sup> Identifying which patients are at risk of severe disease or death, may be useful in decision making, to determine whether hospitalization or ICU referral is required or to enable early intervention.<sup>6</sup> This is of particular importance given that the fast-pace of the pandemic has led to rationing of scarce resources, most notably mechanical ventilators.<sup>7</sup>

Several studies have demonstrated that older age and chronic diseases are associated with poor outcome in patients with COVID-19.<sup>2,5</sup> Although much of the early research describes small case studies without clearly defined outcomes, disease severity has been associated with more prominent laboratory abnormalities including markers of inflammation and organ damage including elevated troponins.<sup>2,8-10</sup> A recently published study showed that in multivariate analysis, older age, higher Sequential Organ Failure Assessment (SOFA) score, and elevated D-dimer on admission were independently associated with in-hospital death.<sup>5</sup> The present study



1  
2  
3 aims to expand on these findings and evaluate which biomarkers are associated with death and  
4  
5 ICU admission in a large nationwide cohort.  
6  
7  
8  
9

## 10 **Methods**

### 11 *Data sources*

12  
13  
14 This study is based on four nationwide registers, The Danish National Patient Register,  
15  
16 The Civil Registration System, The Danish Registry of Medicinal Product Statistics, and the  
17  
18 database on blood samples (LABKA). These four nationwide registers were cross-linked on the  
19  
20 individual level using the unique permanent identification number given to all Danish residents  
21  
22 at birth or migration.  
23  
24  
25

26 The Danish National Patient Register holds information on every hospital visit in  
27  
28 Denmark, in which each visit is registered with a diagnosis according to the International  
29  
30 Classification of Diseases, the 10th revision (ICD-10). The Civil Registration System holds  
31  
32 information on the day of birth, sex, and vital status. The Danish Registry of Medicinal Product  
33  
34 Statistics contains information on all prescriptions dispensed from Danish pharmacies and is  
35  
36 coded according to the Anatomical Therapeutic Chemical (ATC) classification system.<sup>11</sup> The  
37  
38 LABKA database holds information on blood samples from all hospital visits, including the  
39  
40 emergency departments, outpatient consultations, and admissions to the hospital.  
41  
42  
43  
44  
45  
46

### 47 *Study design and participants*

48  
49 This study included all laboratory-confirmed COVID-19 patients aged 18 years and older  
50  
51 with available biochemistry data, admitted to hospital between February 27<sup>th</sup>, 2020, and May 1<sup>st</sup>,  
52  
53 2020 (the first Danish case was recorded on February 27<sup>th</sup>, 2020). Patients were included on the  
54  
55  
56  
57  
58  
59  
60

1  
2  
3 first day of diagnosis with COVID-19 and followed for 30 days for the combined endpoint of all-  
4 cause mortality and ICU admission. A sub-analysis was also performed for the endpoint of all-  
5 cause mortality alone. Blood test results were obtained from electronic registries of laboratory  
6 data, with baseline values taken on admission (measured within 24 hours). We focused on  
7 readily available laboratory tests associated with inflammation or organ damage, including C-  
8 reactive protein (CRP), ferritin, procalcitonin, leucocyte count, estimated glomerular filtration  
9 rate (eGFR), urea, alanine aminotransferase (ALAT), D-dimer and troponin (both T and I). The  
10 eGFR was calculated using the Modification of Diet in Renal Disease (MDMD) equation, which  
11 includes creatinine level, age, race, and sex. In order to compare troponin values with different  
12 assays and reference values, a ratio between observed values and highest reference values was  
13 performed.  
14  
15  
16  
17  
18  
19  
20  
21  
22  
23  
24  
25  
26  
27  
28  
29  
30

### 31 **Statistical analysis**

32  
33 Categorical data were presented as counts with percentages, and the statistical difference  
34 was tested using Fisher's exact test. Continuous variables were presented as medians with the  
35 first and third quartile (Q1 and Q3), and the statistical difference was tested using the Wilcoxon  
36 rank-sum test. Cox analysis and bootstrapping with 100 bootstraps were used to derive age and  
37 gender adjusted standardized absolute risk and average treatment effects curves with 95%  
38 confidence intervals (CI) to evaluate the association between individual biomarkers and the 30-  
39 day risk for each endpoint. The above analysis was repeated with stratification by typical  
40 normal/elevated ranges used in the clinical setting. For the stratified analysis of troponin the  
41 cutoff values were defined as being moderately elevated (>1 to 2 times elevated) and severely  
42  
43  
44  
45  
46  
47  
48  
49  
50  
51  
52  
53  
54  
55  
56  
57  
58  
59  
60

1  
2  
3 elevated (>two times elevated), relative to baseline troponin. A two-sided p-value  $\leq 0.05$  was  
4  
5 considered statistically significant.  
6

7  
8 Data management and statistical analyses were conducted using R statistics (R Core  
9  
10 Team (2020). R: A language and environment for statistical computing. R Foundation for  
11  
12 Statistical Computing, Vienna, Austria. URL <https://www.R-project.org/>).  
13  
14

## 15 16 17 **Results**

18  
19 A total of 4444 patients with COVID-19 were identified in the study period. We excluded  
20  
21 28 patients aged below 18 years old, 2653 patients who were not admitted to hospital and 453  
22  
23 with no available biochemistry data, leaving 1310 patients for inclusion in the study (54.6%  
24  
25 male; median age 73.6). Of these, 352 (26.9%) patients experienced the composite endpoint and  
26  
27 263 (20.1%) died.  
28  
29

30  
31 Baseline characteristics for the total cohort and stratified by the composite endpoint, are  
32  
33 given in Table 1. Patients who experienced the composite endpoint of death/ICU admission  
34  
35 within 30-days were more likely to be older, male, with a pre-existing comorbidity (diabetes,  
36  
37 chronic obstructive pulmonary disease, atrial fibrillation, hypertension or heart failure); currently  
38  
39 receiving treatment with aspirin, beta-blocker, angiotensin II receptor blockers, loop diuretics,  
40  
41 calcium channel blockers, or spironolactone; with higher baseline values of leucocytes, urea, D-  
42  
43 dimer, troponin or procalcitonin; or lower baseline values of eGFR ( $p \leq 0.044$  for all). However,  
44  
45 the proportion of patients who died or were admitted to ICU was not significantly different for  
46  
47 those with prior ischemic stroke, ischemic heart disease, chronic kidney disease, cancer, or  
48  
49 currently receiving treatment with nonsteroidal anti-inflammatory drugs or thiazides.  
50  
51  
52  
53  
54  
55  
56  
57  
58  
59  
60

## ***Biomarkers and Standardized Absolute Risk of Death and Intensive Care Unit Admission***

### *C-reactive protein*

Higher baseline CRP was associated with higher age and sex adjusted absolute risk of death/ICU admission (Figure 2), and death alone (Supplementals, Figure S1).

In stratified analysis, moderately elevated (upper reference limit to 99 mmol/L) and severely elevated (100 to 400 mmol/L) baseline CRP were associated with an age and sex adjusted absolute risk of 21.5% (95%CI: 18.1-24.9) and 39.2% (95%CI: 35.6-43.0) for death/ICU admission within 30 days, respectively, which was a significantly higher risk (both  $p < 0.001$ ) compared to those with normal CRP, absolute risk 5.0% (95%CI: 0.0-12.0) (Figure 3).

Similarly, moderately and severely elevated baseline CRP were associated with an age and sex adjusted absolute risk of 18.1% (95%CI: 15.1-21.3) and 28.8% (95%CI: 25.4-32.1) for 30-day mortality, respectively, which was a significantly higher risk (both  $p < 0.001$ ) compared to those with normal CRP, absolute risk 6.6% (95%CI: 0.0-15.0) (Supplementals, Figure S2).

### *Leucocytes*

Higher baseline leucocyte count was associated with higher age and sex adjusted absolute risk of death/ICU admission (Figure 2), and death alone (Supplementals, Figure S1).

In stratified analysis, moderately elevated (upper reference limit to  $15 \times 10^9/L$ ) and severely elevated ( $15$  to  $30 \times 10^9/L$ ) baseline leucocytes were associated with an age and sex adjusted absolute risk of 34.5% (95%CI: 29.5-39.4) and 46.6% (95%CI: 38.5-54.6) for death/ICU admission within 30 days, respectively, which was a significantly higher risk (both  $p < 0.001$ ) compared to those with normal leucocytes, absolute risk 23.2% (95%CI: 20.4-22.2) (Figure 3).

1  
2  
3 In stratified analysis, moderately and severely elevated baseline leucocytes were  
4 associated with an age and sex adjusted absolute risk of 26.6% (95%CI: 22.0-31.3) and 37.0%  
5 (95%CI: 25.4-32.1) for 30 day-mortality, respectively, which was a significantly higher risk  
6 (both  $p < 0.001$ ) compared to those with normal leucocytes, absolute risk 17.6% (95%CI: 15.0-  
7 20.2) (Supplementals, Figure S2).  
8  
9  
10  
11  
12  
13

### 14 15 16 17 *Estimated glomerular filtration rate*

18  
19 Lower baseline eGFR was associated with higher age and sex adjusted absolute risk of  
20 death/ICU admission (Figure 2), and death alone (Supplementals, Figure S1).  
21  
22

23  
24 In stratified analysis, moderately decreased (30 to 60 mmol/L) and severely decreased (0  
25 to 30 mmol/L) baseline eGFR were associated with an age and sex adjusted risk risk of 41.5%  
26 (95%CI: 35.1-48.0) and 45.9% (95%CI: 34.9-56.8) for death/ICU admission within 30 days,  
27 respectively, which was a significantly higher risk (both  $p < 0.001$ ) compared to those with  
28 normal/mild decreased eGFR ( $>60$  mmol/L), absolute risk 30.4% (95%CI: 26.7-34.1) (Figure 3).  
29  
30  
31  
32

33  
34 In stratified analysis, moderately elevated and severely elevated baseline leucocytes were  
35 associated with an absolute risk of 34.8% (95%CI: 29.0-40.5) and 42.4% (95%CI: 32.9-52.0) for  
36 30-day mortality, respectively, (Figure 3), which was a significantly higher risk (both  $p < 0.001$ )  
37 compared to those with normal/mild decreased eGFR, absolute risk 22.0% (95%CI: 18.5-25.5)  
38 (Supplementals, Figure S2).  
39  
40  
41  
42  
43  
44  
45

### 46 47 48 49 *Urea*

50  
51 Higher baseline urea was associated with higher age and sex adjusted absolute risk of  
52 death/ICU admission (Figure 2), and death alone (Supplementals, Figure S1).  
53  
54  
55  
56  
57  
58  
59  
60

1  
2  
3 In stratified analysis, normal (3.6 to 8.0 mmol/L) and elevated (>8 mmol/L) baseline urea  
4 were associated with an absolute risk of 22.3% (95%CI: 18.7-25.9) and 40.6% (95%CI: 35.5-  
5  
6 45.7) for death/ICU admission within 30 days, respectively, which was a significantly higher risk  
7  
8 (both  $p<0.001$ ) compared to those with low urea, absolute risk 7.3% (95%CI: 1.6-12.9) (Figure  
9  
10  
11  
12 3).

13  
14  
15 In stratified analysis, normal and elevated baseline urea were associated with an absolute  
16  
17 risk of 15.7% (95%CI: 11.2-17.4) and 31.9% (95%CI: 26.8-35.4) for 30-day mortality,  
18  
19 respectively, which was a significantly higher risk (both  $p<0.001$ ) compared to those with low  
20  
21 urea, absolute risk 5.4% (95%CI: 0.0-11.0) (Supplementals, Figure S2).  
22  
23

### 24 25 26 *Alanine aminotransferase*

27  
28 Higher baseline ALAT was associated with slightly higher absolute risk of death/ICU  
29  
30 admission (Figure 2), and death alone (Supplementals, Figure S1).  
31  
32

33 In stratified analysis, elevated (>upper reference limit) baseline ALAT was associated  
34  
35 with an absolute risk of 36.9% (95%CI: 30.7-43.1) for death/ICU admission within 30 days,  
36  
37 which was significantly higher than normal ALAT (10 U/L to upper reference limit), absolute  
38  
39 risk 26.9% (95%CI: 23.6-29.3,  $p=0.002$ ), however not significantly different to low ALAT (<10  
40  
41 U/L), absolute risk 43.8% (95%CI: 21.1-66.4) (Figure 3).  
42  
43

44 In stratified analysis, low baseline ALAT was associated with an absolute risk of 41.0%  
45  
46 (95%CI: 22.7-59.4) for 30-day mortality, which was significantly higher than normal ALAT,  
47  
48 absolute risk 20.8% (95%CI: 18.2-23.4,  $p=0.03$ ), however not significantly different to high  
49  
50 ALAT, absolute risk 25.8% (95%CI: 19.9-31.8) (Supplementals, Figure S2).  
51  
52  
53  
54  
55  
56  
57  
58  
59  
60

### *Ferritin*

Higher baseline ferritin was associated with an inverted U shaped risk of death/ICU admission (Figure 2), and risk of death alone (Supplementals, Figure S1).

In stratified analysis, elevated ( $> 300$  mmol/L) baseline ferritin was associated with an age and sex adjusted absolute risk of 22.7% (95%CI: 15.1-30.3) for death/ICU admission within 30 days, which was not a significantly higher risk compared to those with normal ferritin ( $\leq 300$  mmol/L), absolute risk 19.7% (95%CI: 12.5-32.9) (Figure 3).

In stratified analysis, elevated ( $>300$  mmol/L) baseline ferritin was associated with an age and sex adjusted risk of 15.9% (95%CI: 0.09-22.8) for 30-day mortality, which was not a significantly higher risk compared to those with normal ferritin ( $\leq 300$  mmol/L), absolute risk 19.8% (95%CI: 12.6-26.9) (Supplementals, Figure S2).

### *D-dimer*

Higher baseline D-dimer was associated with an age and sex adjusted higher risk of death/ICU admission (Figure 2), and risk of death alone (Supplementals, Figure S1).

In stratified analysis, elevated ( $>0.5$  mg/L) baseline D-dimer was associated with an age and sex adjusted absolute risk of 31.8% (95%CI: 26.7-36.8) for death/ICU admission within 30 days, which was a significantly higher risk ( $p<0.001$ ) compared to those with normal D-dimer, absolute risk 17.5% (95%CI: 10.9-24.1) (Figure 3).

In stratified analysis, elevated baseline D-dimer was associated with an age and sex adjusted risk of 19.1% (95%CI: 14.7-23.5) for 30-day mortality, which was a significantly higher risk ( $p<0.001$ ) compared to those with normal D-dimer, absolute risk 13.5% (95%CI: 8.5-19.5) (Supplementals, Figure S2).

### *Troponin*

Higher baseline troponin ratio was associated with age and sex adjusted higher risk of death/ICU admission (Figure 2), and risk of death alone (Supplementals, Figure S1).

In stratified analysis, moderately elevated and severely elevated baseline troponin were associated with an age and sex adjusted absolute risk of 27.7% (95%CI: 16.5-38.9) and 57.3% (95%CI: 43.3-71.3) for death/ICU admission within 30 days, respectively, which was a significantly higher absolute risk ( $p=0.003$  and  $p<0.001$ , respectively) compared to those with normal troponins, absolute risk 9.4% (95%CI: 4.2-14.5) (Figure 3).

In stratified analysis, moderately elevated and severely elevated baseline troponin were associated with an age and sex adjusted absolute risk of 10.8% (95%CI: 3.2-18.5) and 35.9% (95%CI: 23.2-48.6) for 30-day mortality, respectively. However, only the later was a significantly higher risk ( $p<0.001$ ) compared to those with normal troponins, absolute risk 3.9% (95%CI: 0.0-8.7) (Supplementals, Figure S2).

### *Procalcitonin*

Higher baseline procalcitonin was associated with age and sex adjusted higher risk of death/ICU admission (Figure 2), and risk of death alone (Supplementals, Figure S1).

In stratified analysis, elevated ( $>0.5$  mcg/L) baseline procalcitonin was associated with an age and sex adjusted risk of 52.1% (95%CI: 41.5-62.6) for death/ICU admission within 30 days, which was a significantly higher risk ( $p<0.001$ ) compared to those with normal procalcitonin, absolute risk 28.0% (95%CI: 21.1-34.9) (Figure 3).



1  
2  
3 In stratified analysis, elevated baseline procalcitonin was associated with an age and sex  
4 adjusted absolute risk of 29.5% (95%CI: 19.9-39.0) for 30-day mortality, which was a  
5 significantly higher absolute risk ( $p=0.03$ ) compared to those with normal procalcitonin, absolute  
6 risk 18.0% (95%CI: 12.0-24.0) (Supplementals, Figure S2).  
7  
8  
9  
10  
11  
12  
13

## 14 **Discussion**

15  
16 This nationwide study is the first of its kind to examine the association between common  
17 biomarkers and risk of early death and ICU admission in adult patients admitted to hospital with  
18 laboratory-confirmed COVID-19. In particular, the inflammatory markers CRP, leucocytes and  
19 procalcitonin, and markers of organ damage including eGFR, troponins and D-dimer are  
20 associated with higher risk of death/ICU admission within 30 days. However, the association  
21 between ferritin and ALAT was non-significant.  
22  
23  
24  
25  
26  
27  
28  
29

30  
31 The novelty of the SARS-CoV-2, coupled with the rapid spread of the COVID-19  
32 pandemic, has led to a tremendous burden on healthcare systems worldwide. To provide optimal  
33 care for patients, early diagnosis and identification of vulnerable patients who are at risk of  
34 severe disease is needed, as well as recognizing patients who may rapidly deteriorate and require  
35 ICU admission and mechanical ventilation. This relies on an accurate knowledge of the critical  
36 clinical predictors for disease progression in order to triage patients and allocate scarce resources  
37 efficiently. This is especially important when considering which patients should start treatment.  
38 For example, in the first trial to offer an effective treatment for COVID-19 disease, results  
39 showed that early administration of antiviral treatment with Remdesivir was superior to placebo  
40 in reducing time to recovery and in particular, the authors highlighted the need to start antiviral  
41 treatment before pulmonary disease progresses to require mechanical ventilation.<sup>12</sup>  
42  
43  
44  
45  
46  
47  
48  
49  
50  
51  
52  
53  
54  
55  
56  
57  
58  
59  
60

1  
2  
3 In the present study, patients who died or were admitted to ICU were more likely to be  
4 older, male, and with a pre-existing comorbidity which is consistent with observed global trends.  
5  
6 Our results are aligned with a recent large cohorts of patients hospitalized with COVID-19 in the  
7  
8 UK and US, as well as meta-analysis of studies from China.<sup>2,13,14</sup> The median age of patients who  
9  
10 died in our study was 81 years, similar to the values noted in the UK study (median 80 years) but  
11  
12 much older compared to patients included in the early studies from the Wuhan region. Similarly,  
13  
14 we reported a greater proportion death/ICU admission among males (64%) and patients with pre-  
15  
16 existing comorbidity (prior diabetes, COPD, atrial fibrillation and hypertension). Differences are  
17  
18 most likely due to a variety of factors including regional differences concerning demographics,  
19  
20 preparedness and knowledge of COVID-19 that have drawn on experience from China and other  
21  
22 countries as the outbreak has spread.  
23  
24  
25  
26  
27

28 In terms of clinical laboratory biomarkers, a recent systematic review of the literature has  
29  
30 highlighted many of the challenges inherent in the early studies of COVID-19, as many of the  
31  
32 early studies are limited by the small size of the study populations with regional bias (most data  
33  
34 is confined to China and Italy), and with limited or poorly defined outcomes.<sup>6</sup> Several studies  
35  
36 have evaluated level of individual biomarkers in small and selected COVID cohorts. An Italian  
37  
38 study including 239 patients, reported that several laboratory parameters including elevated  
39  
40 lymphocytes, procalcitonin, interleukin-6, ferritin, CRP, and ALAT was associated with death  
41  
42 and ICU admission in unadjusted Cox analysis. However, in adjusted analysis CRP was the only  
43  
44 biomarker associated with increased risk of death/ICU admission.  
45  
46  
47  
48

49 An early meta-analysis identified a range of abnormal biomarkers that was elevated in  
50  
51 COVID-19 patients who died, including elevated levels of inflammatory markers and acute  
52  
53 phase reactants such as interleukin-6, CRP, ferritin, lymphopenia, as well as reduced CD4 and  
54  
55  
56  
57  
58  
59  
60

1  
2  
3 CD8 counts and coagulation abnormalities including prolonged PT, increased D-dimer and  
4 thrombocytopenia.<sup>11</sup> We were able to expand on these findings, reporting age and gender  
5 adjusted absolute risk of death/ICU admission of individual biomarkers in a larger, European  
6 cohort. In the present study inflammatory markers such as CRP, leucocytes and procalcitonin,  
7 and markers of organ damage including eGFR, urea, troponins and D-dimer were associated with  
8 higher risk of death/ICU admission within 30 days. However, the association between ferritin  
9 and ALAT was non-significant. The association with inflammatory markers, and acute phase  
10 reactants likely reflects the cytokine storm associated with severe infection and subsequent end-  
11 organ damage from severe sepsis.<sup>15</sup> However, it is also essential to recognize that the acute phase  
12 reactants are non-specific markers of inflammation. For example, procalcitonin secretion is not  
13 induced by gamma-interferon (produced mainly in response to viral infections), making it  
14 primarily an attractive marker of bacterial infections.<sup>16</sup> Nevertheless, bacterial superinfection is  
15 an important consideration in COVID-19; for example, in the study by Wang et al., 81.7% of  
16 patients who died with COVID-19 had an associated bacterial infection.<sup>17</sup> Probably, patients with  
17 longer and more complex admissions or ICU treatment are more vulnerable to secondary  
18 infections e.g. ventilator acquired infection, with an expected rise in procalcitonin levels.  
19 Accordingly, Zhou et al. observed that half of the non-survivors experienced a secondary  
20 infection, with almost a third due to ventilator-associated pneumonia.<sup>5</sup> However, the association  
21 between higher absolute risk of death/ICU admission and elevated baseline procalcitonin in the  
22 present study suggests that early concomitant bacterial infection (not only secondary infection) is  
23 a significant factor in adverse prognosis for patients with COVID-19 that clinicians should be  
24 aware of.  
25  
26  
27  
28  
29  
30  
31  
32  
33  
34  
35  
36  
37  
38  
39  
40  
41  
42  
43  
44  
45  
46  
47  
48  
49  
50  
51  
52  
53  
54  
55  
56  
57  
58  
59  
60

1  
2  
3 In the study including 191 patients from Wuhan region, leucocytes, older age, higher  
4 Sequential Organ Failure Assessment (SOFA) score, and a higher D-dimer (greater than 1 µg/L  
5 on admission) were all associated with in-hospital mortality in patients with COVID-19.<sup>5</sup>  
6  
7 Although the SOFA score is mainly a diagnostic marker of sepsis and septic shock, it may reflect  
8 the state and degree of multi-organ dysfunction due to infection in general.<sup>18</sup> In the present study,  
9  
10 abnormal values of biomarkers reflecting organ damage including troponin, eGFR, urea, and D-  
11 dimer were all associated with higher absolute risk of 30-day mortality and ICU admission.  
12  
13 Myocarditis is a known morbidity amongst patients with COVID-19.<sup>19</sup> Elevated troponin may  
14 reflect myocardial injury among COVID-19 patients, including direct damage to the  
15 cardiomyocytes, systemic inflammation, myocardial interstitial fibrosis, coronary plaque  
16 destabilization and hypoxia.<sup>20</sup> Furthermore, patients with cardiovascular disease are more likely  
17 to be admitted with COVID-19, with greater risk of cardiac involvement as their symptoms  
18 develop.<sup>20</sup> With respect to the abnormalities observed in D-dimer, research suggests that  
19 respiratory failure in COVID-19 is not only related to development of the acute respiratory  
20 distress syndrome (ARDS), but also due to microvascular thrombotic processes, which are  
21 associated with elevated D-dimer.<sup>21</sup> Finally, beyond the high mortality observed in those with  
22 organ dysfunction and respiratory failure, a generalized coagulopathy has also been noted in  
23 those with poor prognosis.<sup>22</sup>  
24  
25  
26  
27  
28  
29  
30  
31  
32  
33  
34  
35  
36  
37  
38  
39  
40  
41  
42  
43  
44  
45  
46

#### 47 **Strengths and limitations:**

48  
49 The main strength of this study is the completeness of data from a nationwide, European  
50 cohort and the avoidance of selection bias resulting from race, age, sex, socioeconomic status,  
51 affiliation to selected hospitals, or healthcare systems. The Danish National Patient Registry and  
52  
53  
54  
55  
56  
57  
58  
59  
60

1  
2  
3 the Danish Registry of Medicinal Product Statistics are known to be accurate.<sup>23,24</sup> The main  
4  
5 limitation of our study is its observational non-randomized design. There is a lack of information  
6  
7 about important clinical parameters, including blood pressure, body mass index, and smoking  
8  
9 habits.  
10

11  
12  
13 This study included only patients admitted to the hospital with COVID-19 and with  
14  
15 measured baseline biochemical data. Therefore, it is likely to represent symptomatic patients,  
16  
17 who are more likely to be elderly or with more comorbidities and at the more severe end of the  
18  
19 disease spectrum. Furthermore, patients in the cohort may present to hospital at differing stages  
20  
21 of their disease. A large proportion of patients with confirmed COVID-19 in Denmark had  
22  
23 missing biochemistry data, which most likely represents patients who attended the emergency  
24  
25 room with mild symptoms, which did not warrant admission or blood tests, and were not  
26  
27 included in this study, thus leading to selection bias and limiting generalisability. Some  
28  
29 biomarkers (particularly D-dimer, troponin and procalcitonin) are likely to be measured in those  
30  
31 with the most severe disease (confounding by indication).  
32  
33  
34  
35  
36  
37  
38

### 39 **Conclusions:**

40  
41 In this nationwide study of patients admitted with COVID-19, elevated levels of CRP,  
42  
43 leucocytes, procalcitonin, urea, troponins and D-dimer, and low levels of eGFR were associated  
44  
45 with higher standardized absolute risk of death/ICU admission within 30 days.  
46  
47  
48  
49

### 50 **Footnotes**

1  
2  
3 **Contributors:** All authors approved the final manuscript. The corresponding author attests that  
4 all listed authors meet authorship criteria and that no others meeting the criteria have been  
5  
6 omitted.  
7  
8  
9

### 12 **Funding**

14 This research received no specific grant from any funding agency in the public, commercial or  
15 not-for-profit sectors.  
16  
17  
18  
19  
20

21 **Competing interests:** All authors have completed the ICMJE uniform disclosure form  
22 at [www.icmje.org/coi\\_disclosure.pdf](http://www.icmje.org/coi_disclosure.pdf) and declare: no support from any organization for the  
23 submitted work; no competing interests with regards to the submitted work.  
24  
25  
26  
27  
28  
29

30 **Ethical approval:** In Denmark, retrospective register studies do not require approval from the  
31 ethics committees or individual informed consent. The data responsible institute (The Capital  
32 Region of Denmark) approved this study (ref. no.: P-2019-191), in line with the General Data  
33 Protection Regulation (GDPR) and The Data Protection Act. Data were made available in a  
34 pseudonymized format such that specific individuals could not be identified. Dissemination to  
35 study patients is not possible/applicable.  
36  
37  
38  
39  
40  
41  
42  
43  
44  
45  
46

47 **Patient and Public Involvement:** This research was done without patient involvement. Patients  
48 were not invited to comment on the study design and were not consulted to develop patient  
49 relevant outcomes or interpret the results. Patients were not invited to contribute to the writing or  
50 editing of this document for readability or accuracy.  
51  
52  
53  
54  
55  
56  
57  
58  
59  
60

1  
2  
3  
4  
5 **Transparency declaration:** The lead authors affirm that the manuscript is an honest, accurate,  
6 and transparent account of the study being reported; that no important aspects of the study have  
7  
8 been omitted; and that any discrepancies from the study as planned have been explained.  
9  
10  
11  
12  
13  
14  
15  
16  
17  
18  
19  
20  
21  
22  
23  
24  
25  
26  
27  
28  
29  
30  
31  
32  
33  
34  
35  
36  
37  
38  
39  
40  
41  
42  
43  
44  
45  
46  
47  
48  
49  
50  
51  
52  
53  
54  
55  
56  
57  
58  
59  
60

1. World Health Organization. Coronavirus disease (COVID-19) outbreak (<https://www.who.int>).
2. Guan, W. *et al.* Clinical Characteristics of Coronavirus Disease 2019 in China. *N. Engl. J. Med.* (2020). doi:10.1056/nejmoa2002032
3. Yang, X. *et al.* Articles Clinical course and outcomes of critically ill patients with SARS-CoV-2 pneumonia in Wuhan, China: a single-centered, retrospective, observational study. (2020). doi:10.1016/S2213-2600(20)30079-5
4. Inciardi, R. M. *et al.* Cardiac Involvement in a Patient with Coronavirus Disease 2019 (COVID-19). *JAMA Cardiol.* (2020). doi:10.1001/jamacardio.2020.1096
5. Zhou, F. *et al.* Articles Clinical course and risk factors for mortality of adult inpatients with COVID-19 in Wuhan, China: a retrospective cohort study. (2020). doi:10.1016/S0140-6736(20)30566-3
6. Wynants, L. *et al.* Prediction models for diagnosis and prognosis of covid-19 infection: systematic review and critical appraisal What is Already known on this topic. doi:10.1136/bmj.m1328
7. Truog, R. D., Mitchell, C. & Daley, G. Q. The Toughest Triage — Allocating Ventilators in a Pandemic. *N. Engl. J. Med.* (2020). doi:10.1056/nejmp2005689
8. Huang, C. *et al.* Clinical features of patients infected with 2019 novel coronavirus in Wuhan, China. *www.thelancet.com* **395**, 497 (2020).
9. Chen, N. *et al.* Epidemiological and clinical characteristics of 99 cases of 2019 novel coronavirus pneumonia in Wuhan, China: a descriptive study. *Lancet* **395**, 507–513 (2020).
10. Lippi, G., Lavie, C. J. & Sanchis-Gomar, F. Cardiac troponin I in patients with coronavirus disease 2019 (COVID-19): Evidence from a meta-analysis. *Progress in Cardiovascular Diseases* (2020). doi:10.1016/j.pcad.2020.03.001
11. Andersen, T. F., Madsen, M., Jørgensen, J., Mellemkjoer, L. & Olsen, J. H. The Danish National Hospital Register. A valuable source of data for modern health sciences. *Dan Med Bull.* **46**, 263-268 (1999).
12. Beigel, J. H. *et al.* Remdesivir for the Treatment of Covid-19 — Preliminary Report. *N. Engl. J. Med.* **NEJMoa2007764** (2020). doi:10.1056/NEJMoa2007764
13. Martins-Filho, P. R., Tavares, C. S. S. & Santos, V. S. Factors associated with mortality in patients with COVID-19. A quantitative evidence synthesis of clinical and laboratory data. *Eur. J. Intern. Med.* (2020). doi:10.1016/j.ejim.2020.04.043
14. Cecconi, M. *et al.* Early Predictors of Clinical Deterioration in a Cohort of 239 Patients Hospitalized for Covid-19 Infection in Lombardy, Italy. *J. Clin. Med.* **9**, 1548 (2020).
15. Mehta, P. *et al.* COVID-19: consider cytokine storm syndromes and immunosuppression. *The Lancet* **395**, 1033–1034 (2020).
16. Samsudin, I. & Vasikaran, S. D. Clinical utility and measurement of procalcitonin. *Clinical Biochemist Reviews* **38**, 59–68 (2017).
17. Wang, L. *et al.* Coronavirus Disease 2019 in elderly patients: characteristics and prognostic factors based on 4-week follow-up. *J. Infect.* (2020). doi:10.1016/j.jinf.2020.03.019
18. Singer, M. *et al.* The third international consensus definitions for sepsis and septic shock (sepsis-3). *JAMA - Journal of the American Medical Association* **315**, 801–810 (2016).
19. Babapoor-Farrokhran, S. *et al.* Myocardial injury and COVID-19: Possible mechanisms.



- 1  
2  
3 *Life Sci.* **253**, 117723 (2020).
- 4 20. Madjid, M., Safavi-Naeini, P., Solomon, S. D. & Vardeny, O. Potential Effects of  
5 Coronaviruses on the Cardiovascular System: A Review. *JAMA Cardiology* (2020).  
6 doi:10.1001/jamacardio.2020.1286  
7
- 8 21. Magro, C. *et al.* Complement associated microvascular injury and thrombosis in the  
9 pathogenesis of severe COVID-19 infection: a report of five cases. *Transl. Res.* (2020).  
10 doi:10.1016/j.trsl.2020.04.007
- 11 22. Tang, N., Li, D., Wang, X. & Sun, Z. Abnormal coagulation parameters are associated  
12 with poor prognosis in patients with novel coronavirus pneumonia. *J. Thromb. Haemost.*  
13 **18**, 844–847 (2020).
- 14 23. Schmidt, M. *et al.* The Danish National Patient Registry: a review of content, data quality,  
15 and research potential. *Clin. Epidemiol.* **7**, 449 (2015).
- 16 24. Schmidt, M., Pedersen, L. & Sørensen, H. T. The Danish Civil Registration System as a  
17 tool in epidemiology. *European Journal of Epidemiology* **29**, 541–549 (2014).  
18  
19  
20  
21  
22  
23  
24  
25  
26  
27  
28  
29  
30  
31  
32  
33  
34  
35  
36  
37  
38  
39  
40  
41  
42  
43  
44  
45  
46  
47  
48  
49  
50  
51  
52  
53  
54  
55  
56  
57  
58  
59  
60

## Tables

Table 1: Characteristics of patients with coronavirus disease 2019 for total cohort, and stratified by death/ICU admission (within 30-days of diagnosis).

|                                     | Total                 | No Death/ICU admission | Death/ICU admission    | p      |
|-------------------------------------|-----------------------|------------------------|------------------------|--------|
| <b>Characteristics</b>              | 1310                  | 958 (73.1)             | 352 (26.9)             |        |
| Age, years (median [IQR])           | 73.60 [60.50, 81.90]  | 71.15 [56.52, 79.80]   | 77.50 [70.18, 84.53]   | <0.001 |
| Male sex, n (%)                     | 715 (54.6)            | 489 (51.0)             | 226 (64.2)             | <0.001 |
| Prior ischemic stroke, n (%)        | 96 ( 7.3)             | 63 ( 6.6)              | 33 ( 9.4)              | 0.094  |
| Prior diabetes, n (%)               | 221 (16.9)            | 145 (15.1)             | 76 (21.6)              | 0.008  |
| Prior ischemic heart disease, n (%) | 165 (12.6)            | 116 (12.1)             | 49 (13.9)              | 0.398  |
| Prior COPD, n (%)                   | 135 (10.3)            | 86 ( 9.0)              | 49 (13.9)              | 0.010  |
| Prior atrial fibrillation, n (%)    | 212 (16.2)            | 132 (13.8)             | 80 (22.7)              | <0.001 |
| Prior chronic kidney disease, n (%) | 131 (10.0)            | 88 ( 9.2)              | 43 (12.2)              | 0.119  |
| Prior hypertension, n (%)           | 474 (36.2)            | 323 (33.7)             | 151 (42.9)             | 0.002  |
| Prior cancer, n (%)                 | 194 (14.8)            | 140 (14.6)             | 54 (15.3)              | 0.727  |
| Heart failure, n (%)                | 95 ( 7.3)             | 60 ( 6.3)              | 35 ( 9.9)              | 0.030  |
| Glimepiride, n (%)                  | 245 (18.7)            | 164 (17.1)             | 81 (23.0)              | 0.017  |
| Aspirin, n (%)                      | 174 (13.3)            | 111 (11.6)             | 63 (17.9)              | 0.004  |
| NSAID, n (%)                        | 140 (10.7)            | 103 (10.8)             | 37 (10.5)              | 1.000  |
| Beta blocker, n (%)                 | 174 (13.3)            | 111 (11.6)             | 63 (17.9)              | 0.004  |
| ACEi, n (%)                         | 203 (15.5)            | 144 (15.0)             | 59 (16.8)              | 0.439  |
| ARB, n (%)                          | 463 (35.3)            | 323 (33.7)             | 140 (39.8)             | 0.044  |
| Loop diuretic, n (%)                | 217 (16.6)            | 138 (14.4)             | 79 (22.4)              | 0.001  |
| Thiazide diuretic, n (%)            | 116 ( 8.9)            | 87 ( 9.1)              | 29 ( 8.2)              | 0.742  |
| CCB, n (%)                          | 241 (18.4)            | 157 (16.4)             | 84 (23.9)              | 0.003  |
| Spirolactones = 1 (%)               | 69 ( 5.3)             | 41 ( 4.3)              | 28 ( 8.0)              | 0.012  |
| CRP, n (%)                          | 1256 (95.9)           | 906 (94.6)             | 350 (99.4)             | <0.001 |
| Leucocytes, n (%)                   | 1300 (99.2)           | 952 (99.4)             | 348 (98.9)             | 0.472  |
| eGFR, n (%)                         | 915 (69.8)            | 619 (64.6)             | 296 (84.1)             | <0.001 |
| Urea, n (%)                         | 1067 (81.5)           | 781 (81.5)             | 286 (81.2)             | 0.936  |
| ALAT, n (%)                         | 1167 (89.1)           | 850 (88.7)             | 317 (90.1)             | 0.549  |
| Ferritin, n (%)                     | 252 (19.2)            | 205 (21.4)             | 47 (13.4)              | 0.001  |
| D-dimer, n (%)                      | 449 (34.3)            | 332 (34.7)             | 117 (33.2)             | 0.646  |
| Troponin, n (%)                     | 258 (19.7)            | 197 (20.6)             | 61 (17.3)              | 0.210  |
| Procalcitonin, n (%)                | 249 (19.0)            | 164 (17.1)             | 85 (24.1)              | 0.005  |
| CRP, mg/L (median [IQR])            | 88.00 [43.00, 160.00] | 74.50 [35.25, 130.00]  | 131.00 [68.25, 218.00] | <0.001 |
| Leucocytes, 10E9/L (median [IQR])   | 7.40 [5.50, 10.20]    | 7.10 [5.30, 9.60]      | 8.40 [6.12, 11.90]     | <0.001 |
| eGFR, mL/min/1.73m2 (median [IQR])  | 73.23 [56.39, 83.55]  | 74.80 [60.97, 84.17]   | 66.45 [48.43, 81.33]   | <0.001 |
| Urea, mmol/L (median [IQR])         | 6.50 [4.60, 9.60]     | 5.90 [4.20, 8.30]      | 9.05 [6.60, 12.47]     | <0.001 |

1  
2  
3  
4  
5  
6  
7  
8  
9  
10  
11  
12  
13  
14  
15  
16  
17  
18  
19  
20  
21  
22  
23  
24  
25  
26  
27  
28  
29  
30  
31  
32  
33  
34  
35  
36  
37  
38  
39  
40  
41  
42  
43  
44  
45  
46  
47

|                                                                                                                                                                                                                                                                                                                                                              |                         |                         |                         |        |
|--------------------------------------------------------------------------------------------------------------------------------------------------------------------------------------------------------------------------------------------------------------------------------------------------------------------------------------------------------------|-------------------------|-------------------------|-------------------------|--------|
| <b>ALAT, U/L (median [IQR])</b>                                                                                                                                                                                                                                                                                                                              | 31.00 [21.00, 52.00]    | 31.00 [21.00, 51.00]    | 32.00 [22.00, 53.00]    | 0.169  |
| <b>Ferritin, µg/L (median [IQR])</b>                                                                                                                                                                                                                                                                                                                         | 266.00 [143.00, 446.75] | 264.00 [130.00, 439.00] | 311.00 [189.50, 464.00] | 0.110  |
| <b>D-dimer, mg/L (median [IQR])</b>                                                                                                                                                                                                                                                                                                                          | 0.94 [0.55, 1.80]       | 0.86 [0.51, 1.63]       | 1.40 [0.77, 2.40]       | <0.001 |
| <b>Troponin ratio (median [IQR])</b>                                                                                                                                                                                                                                                                                                                         | 1.00 [0.57, 1.79]       | 0.92 [0.39, 1.34]       | 2.14 [1.29, 3.43]       | <0.001 |
| <b>Procalcitonin, µg/L (median [IQR])</b>                                                                                                                                                                                                                                                                                                                    | 0.20 [0.11, 0.49]       | 0.15 [0.08, 0.28]       | 0.40 [0.20, 0.92]       | <0.001 |
| ACEi, angiotensin-converting enzyme inhibitor; ALAT, alanintransaminase; ARB, angiotensin receptor blocker; CCB, calcium channel blocker; COPD, chronic obstructive pulmonary disease; CRP, C-reactive protein; eGFR, estimated glomerular filtration rate; ICU, intensive care unit; IQR, inter-quartile range; NSAID, nonsteroidal anti-inflammatory drug. |                         |                         |                         |        |

For peer review only

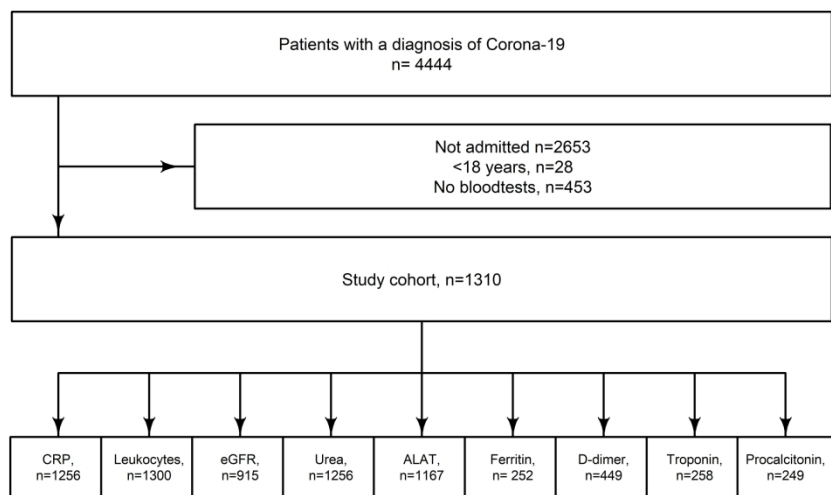

Figure 1: Flowchart of study cohort

Legend: ALAT, alanintransaminase; CRP, C-reactive protein; eGFR, estimated glomerular filtration rate.

254x152mm (300 x 300 DPI)

1  
2  
3  
4  
5  
6  
7  
8  
9  
10  
11  
12  
13  
14  
15  
16  
17  
18  
19  
20  
21  
22  
23  
24  
25  
26  
27  
28  
29  
30  
31  
32  
33  
34  
35  
36  
37  
38  
39  
40  
41  
42  
43  
44  
45  
46  
47  
48  
49  
50  
51  
52  
53  
54  
55  
56  
57  
58  
59  
60

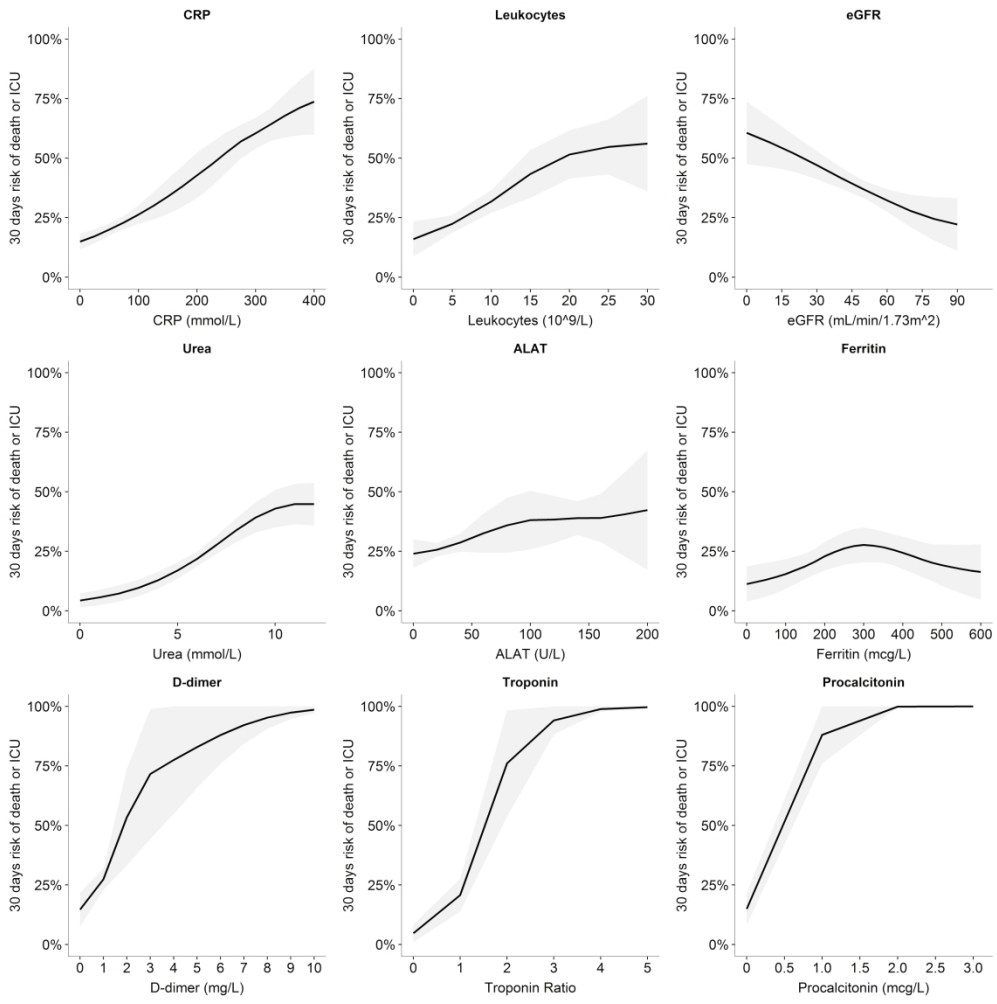

Figure 2: 30-day absolute risk for the composite outcome of death or ICU admission, adjusted for age and gender. Legend: ALAT, alanintransaminase; CRP, C-reactive protein; eGFR, estimated glomerular filtration rate; ICU, intensive care unit.

381x381mm (300 x 300 DPI)

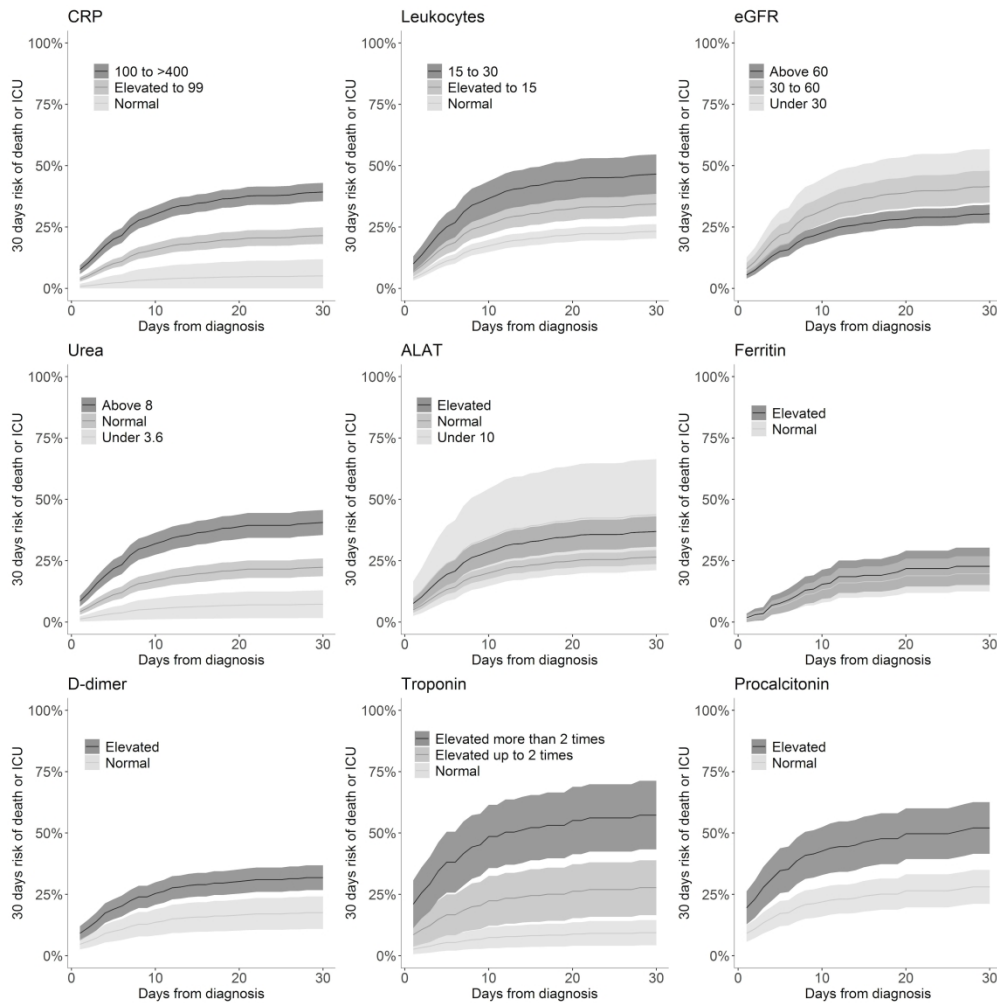

Figure 3: 30-day absolute risk for the composite outcome of death or ICU admission, stratified by normal/elevated ranges, and adjusted for age and gender. Legend: ALAT, alanintransaminase; CRP, C-reactive protein; eGFR, estimated glomerular filtration rate; ICU, intensive care unit.

381x381mm (300 x 300 DPI)

**Table S1: Characteristics of patients with coronavirus disease 2019 for total cohort, survivors and non-survivors (within 30-days of diagnosis).**

|                                     | Total                   | Survivors               | Non-survivors           | p      |
|-------------------------------------|-------------------------|-------------------------|-------------------------|--------|
| Characteristics                     | 1310                    | 1047 (79.9%)            | 263 (20.1%)             |        |
| Age, years (median [IQR])           | 73.60 [60.50, 81.90]    | 70.60 [56.55, 79.40]    | 81.40 [74.10, 86.05]    | <0.001 |
| Male sex, n (%)                     | 715 (54.6)              | 552 (52.7)              | 163 (62.0)              | 0.008  |
| Prior ischemic stroke, n (%)        | 96 (7.3)                | 66 (6.3)                | 30 (11.4)               | 0.008  |
| Prior diabetes, n (%)               | 221 (16.9)              | 161 (15.4)              | 60 (22.8)               | 0.006  |
| Prior ischemic heart disease, n (%) | 165 (12.6)              | 128 (12.2)              | 37 (14.1)               | 0.407  |
| Prior COPD, n (%)                   | 135 (10.3)              | 93 (8.9)                | 42 (16.0)               | 0.001  |
| Prior atrial fibrillation, n (%)    | 212 (16.2)              | 139 (13.3)              | 73 (27.8)               | <0.001 |
| Prior chronic kidney disease, n (%) | 131 (10.0)              | 94 (9.0)                | 37 (14.1)               | 0.021  |
| Prior hypertension, n (%)           | 474 (36.2)              | 358 (34.2)              | 116 (44.1)              | 0.003  |
| Prior cancer, n (%)                 | 194 (14.8)              | 149 (14.2)              | 45 (17.1)               | 0.245  |
| Heart failure, n (%)                | 95 (7.3)                | 61 (5.8)                | 34 (12.9)               | <0.001 |
| Glimepiride, n (%)                  | 245 (18.7)              | 184 (17.6)              | 61 (23.2)               | 0.042  |
| Aspirin, n (%)                      | 174 (13.3)              | 122 (11.7)              | 52 (19.8)               | 0.001  |
| NSAID, n (%)                        | 140 (10.7)              | 115 (11.0)              | 25 (9.5)                | 0.577  |
| Beta blocker, n (%)                 | 174 (13.3)              | 122 (11.7)              | 52 (19.8)               | 0.001  |
| ACEi, n (%)                         | 203 (15.5)              | 158 (15.1)              | 45 (17.1)               | 0.446  |
| ARB, n (%)                          | 463 (35.3)              | 361 (34.5)              | 102 (38.8)              | 0.195  |
| Loop diuretic, n (%)                | 217 (16.6)              | 146 (13.9)              | 71 (27.0)               | <0.001 |
| Thiazide diuretic, n (%)            | 116 (8.9)               | 94 (9.0)                | 22 (8.4)                | 0.809  |
| CCB, n (%)                          | 241 (18.4)              | 186 (17.8)              | 55 (20.9)               | 0.248  |
| Spirolactones = 1 (%)               | 69 (5.3)                | 45 (4.3)                | 24 (9.1)                | 0.003  |
| CRP, n (%)                          | 1256 (95.9)             | 994 (94.9)              | 262 (99.6)              | <0.001 |
| Leucocytes, n (%)                   | 1300 (99.2)             | 1041 (99.4)             | 259 (98.5)              | 0.121  |
| eGFR, n (%)                         | 915 (69.8)              | 693 (66.2)              | 222 (84.4)              | <0.001 |
| Urea, n (%)                         | 1067 (81.5)             | 861 (82.2)              | 206 (78.3)              | 0.156  |
| ALAT, n (%)                         | 1167 (89.1)             | 936 (89.4)              | 231 (87.8)              | 0.507  |
| Ferritin, n (%)                     | 252 (19.2)              | 213 (20.3)              | 39 (14.8)               | 0.044  |
| D-dimer, n (%)                      | 449 (34.3)              | 380 (36.3)              | 69 (26.2)               | 0.002  |
| Troponin, n (%)                     | 258 (19.7)              | 223 (21.3)              | 35 (13.3)               | 0.003  |
| Procalcitonin, n (%)                | 249 (19.0)              | 200 (19.1)              | 49 (18.6)               | 0.930  |
| CRP, mg/L (median [IQR])            | 88.00 [43.00, 160.00]   | 80.00 [38.00, 143.00]   | 122.50 [61.25, 210.00]  | <0.001 |
| Leucocytes, 10E9/L (median [IQR])   | 7.40 [5.50, 10.20]      | 7.20 [5.31, 9.70]       | 8.50 [6.16, 12.05]      | <0.001 |
| eGFR, mL/min/1.73m2 (median [IQR])  | 73.23 [56.39, 83.55]    | 74.94 [61.40, 84.27]    | 62.23 [45.46, 77.93]    | <0.001 |
| Urea, mmol/L (median [IQR])         | 6.50 [4.60, 9.60]       | 6.00 [4.20, 8.40]       | 9.80 [7.32, 13.23]      | <0.001 |
| ALAT, U/L (median [IQR])            | 31.00 [21.00, 52.00]    | 31.50 [21.00, 52.00]    | 30.00 [20.00, 47.00]    | 0.177  |
| Ferritin, µg/L (median [IQR])       | 266.00 [143.00, 446.75] | 266.00 [130.00, 449.00] | 260.00 [182.50, 388.50] | 0.806  |

|                                                                                                                                                                                                                                                                                                                                                             |                   |                   |                   |        |
|-------------------------------------------------------------------------------------------------------------------------------------------------------------------------------------------------------------------------------------------------------------------------------------------------------------------------------------------------------------|-------------------|-------------------|-------------------|--------|
| <b>D-dimer, mg/L (median [IQR])</b>                                                                                                                                                                                                                                                                                                                         | 0.94 [0.55, 1.80] | 0.90 [0.54, 1.66] | 1.40 [0.73, 2.80] | 0.001  |
| <b>Troponin ratio (median [IQR])</b>                                                                                                                                                                                                                                                                                                                        | 1.00 [0.57, 1.79] | 0.93 [0.45, 1.50] | 2.86 [1.82, 4.11] | <0.001 |
| <b>Procalcitonin, µg/L (median [IQR])</b>                                                                                                                                                                                                                                                                                                                   | 0.20 [0.11, 0.49] | 0.18 [0.10, 0.40] | 0.36 [0.19, 0.92] | <0.001 |
| ACEi, angiotensin-converting enzyme inhibitor; ALAT, alanintransaminase; ARB, angiotensin receptor blocker; CCB, calcium channel blocker; COPD, chronic obstructive pulmonary disease; CRP, C-reactive protein; eGFR, estimated glomerular filtration rate; ICU, intensive care unit; IQR, inter-quartile range; NSAID, nonsteroidal anti-inflammatory drug |                   |                   |                   |        |

For peer review only



1  
2  
3  
4  
5  
6  
7  
8  
9  
10  
11  
12  
13  
14  
15  
16  
17  
18  
19  
20  
21  
22  
23  
24  
25  
26  
27  
28  
29  
30  
31  
32  
33  
34  
35  
36  
37  
38  
39  
40  
41  
42  
43  
44  
45  
46

For peer review only

**Figure S1: 30-day absolute risk of death, adjusted for age and gender.**

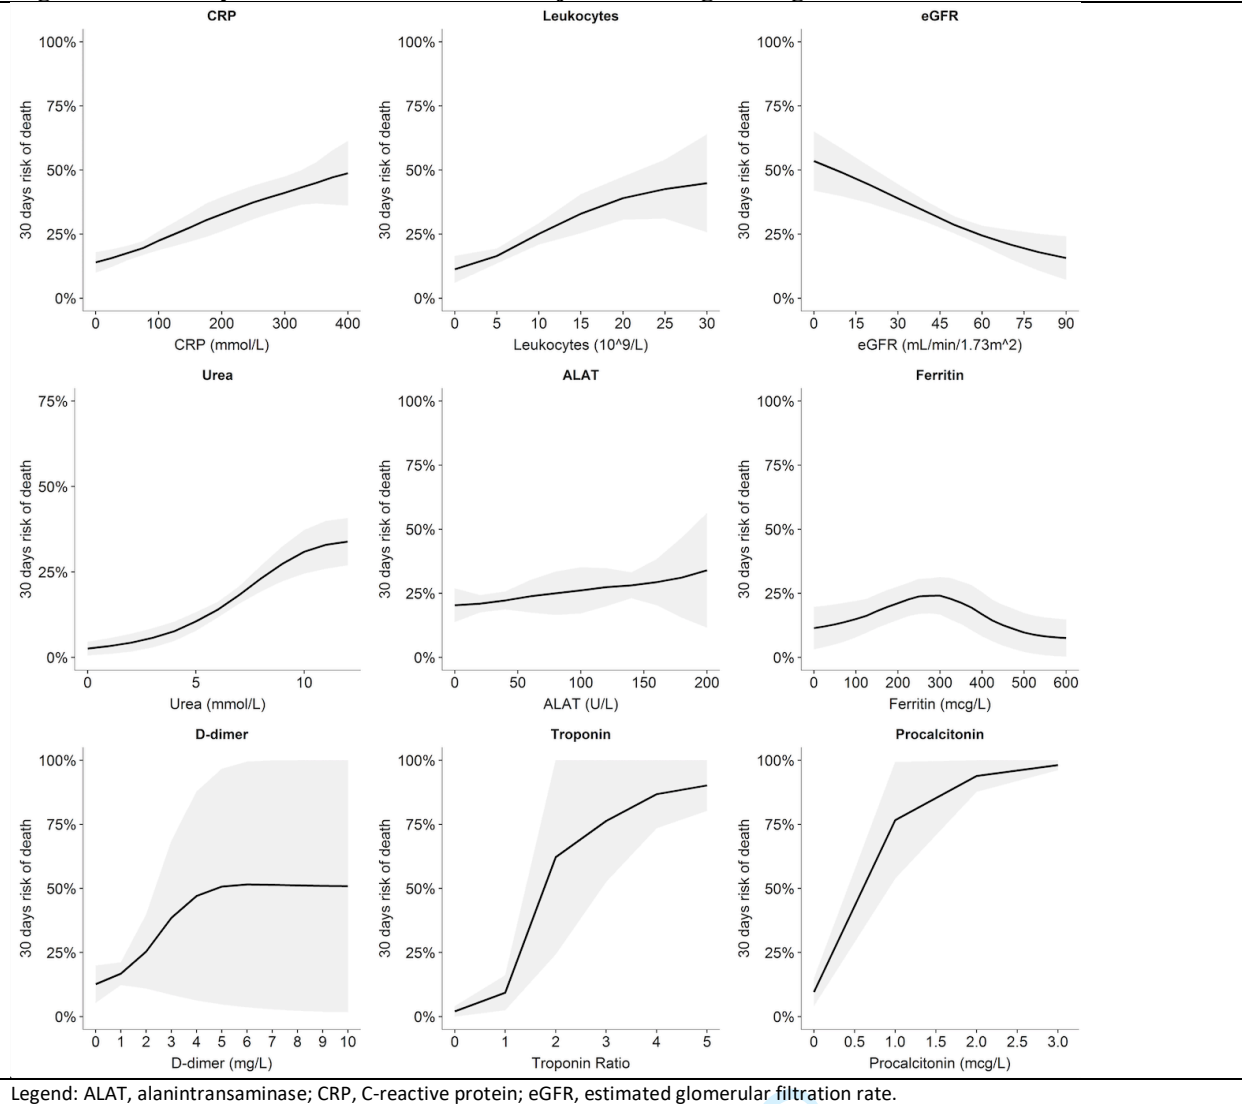

**Figure S2: 30-day absolute risk of death, stratified by normal/elevated ranges, and adjusted for age and gender.**

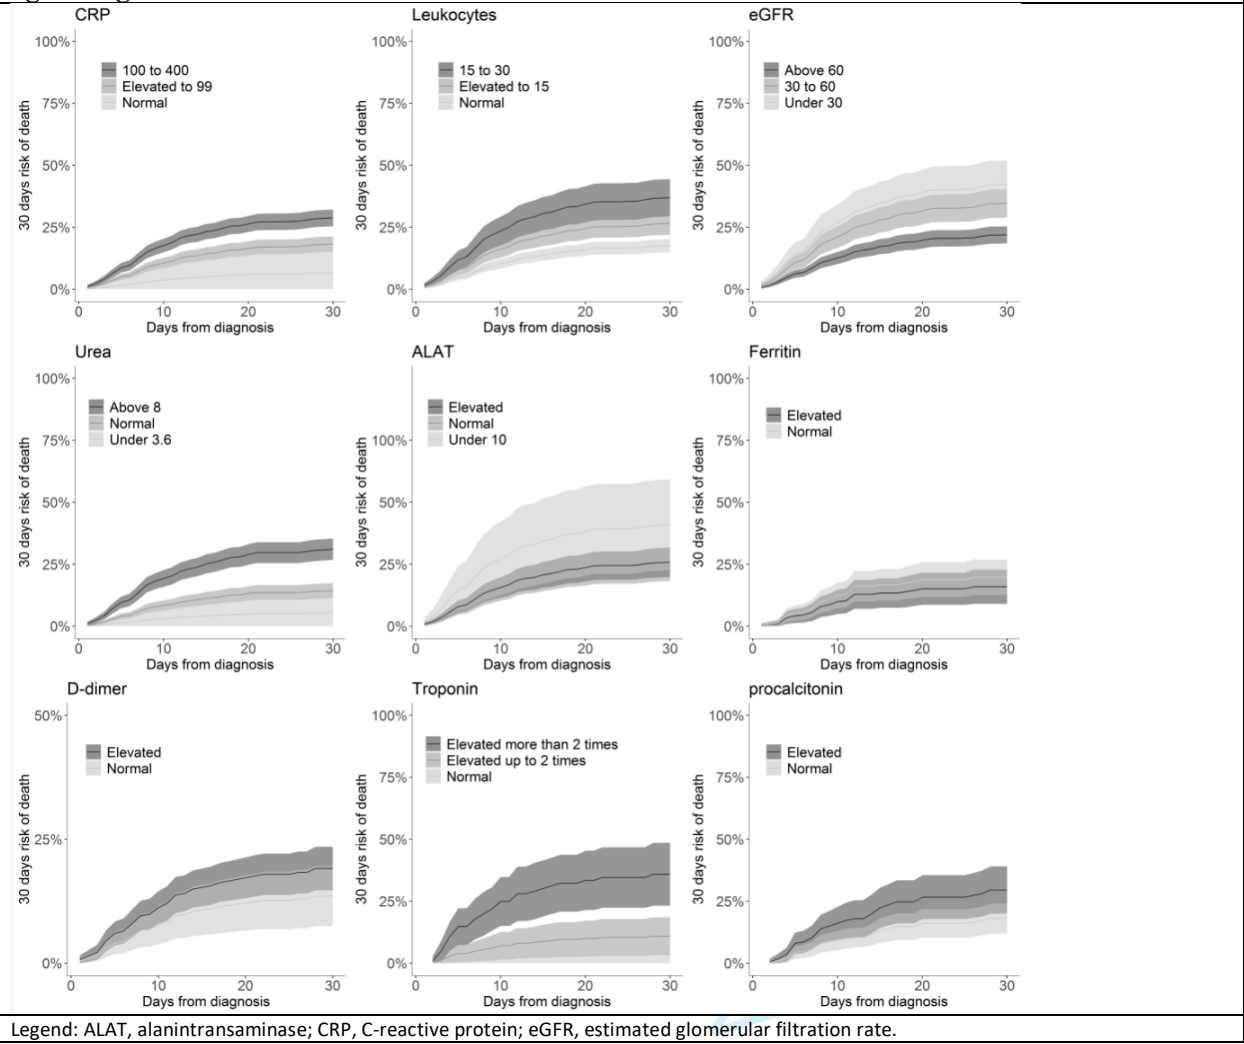

Only

**STROBE 2007 (v4) Statement—Checklist of items that should be included in reports of *cohort studies***

| Section/Topic                | Item # | Recommendation                                                                                                                                                                       | Reported on page # |
|------------------------------|--------|--------------------------------------------------------------------------------------------------------------------------------------------------------------------------------------|--------------------|
| <b>Title and abstract</b>    | 1      | (a) Indicate the study's design with a commonly used term in the title or the abstract                                                                                               | 1                  |
|                              |        | (b) Provide in the abstract an informative and balanced summary of what was done and what was found                                                                                  | 3                  |
| <b>Introduction</b>          |        |                                                                                                                                                                                      |                    |
| Background/rationale         | 2      | Explain the scientific background and rationale for the investigation being reported                                                                                                 | 5-6                |
| Objectives                   | 3      | State specific objectives, including any prespecified hypotheses                                                                                                                     | 6                  |
| <b>Methods</b>               |        |                                                                                                                                                                                      |                    |
| Study design                 | 4      | Present key elements of study design early in the paper                                                                                                                              | 6-7                |
| Setting                      | 5      | Describe the setting, locations, and relevant dates, including periods of recruitment, exposure, follow-up, and data collection                                                      | 6-7                |
| Participants                 | 6      | (a) Give the eligibility criteria, and the sources and methods of selection of participants. Describe methods of follow-up                                                           | 6-7                |
|                              |        | (b) For matched studies, give matching criteria and number of exposed and unexposed                                                                                                  |                    |
| Variables                    | 7      | Clearly define all outcomes, exposures, predictors, potential confounders, and effect modifiers. Give diagnostic criteria, if applicable                                             | 7-8                |
| Data sources/<br>measurement | 8*     | For each variable of interest, give sources of data and details of methods of assessment (measurement). Describe comparability of assessment methods if there is more than one group | 6-8                |
| Bias                         | 9      | Describe any efforts to address potential sources of bias                                                                                                                            | 7                  |
| Study size                   | 10     | Explain how the study size was arrived at                                                                                                                                            | 7                  |
| Quantitative variables       | 11     | Explain how quantitative variables were handled in the analyses. If applicable, describe which groupings were chosen and why                                                         | 7-8                |
| Statistical methods          | 12     | (a) Describe all statistical methods, including those used to control for confounding                                                                                                | 7-8                |
|                              |        | (b) Describe any methods used to examine subgroups and interactions                                                                                                                  | 7                  |
|                              |        | (c) Explain how missing data were addressed                                                                                                                                          | 7-8                |
|                              |        | (d) If applicable, explain how loss to follow-up was addressed                                                                                                                       | N/A                |
|                              |        | (e) Describe any sensitivity analyses                                                                                                                                                | N/A                |
| <b>Results</b>               |        |                                                                                                                                                                                      |                    |

|                          |     |                                                                                                                                                                                                              |                    |
|--------------------------|-----|--------------------------------------------------------------------------------------------------------------------------------------------------------------------------------------------------------------|--------------------|
| Participants             | 13* | (a) Report numbers of individuals at each stage of study—eg numbers potentially eligible, examined for eligibility, confirmed eligible, included in the study, completing follow-up, and analysed            | 8                  |
|                          |     | (b) Give reasons for non-participation at each stage                                                                                                                                                         | 7-8                |
|                          |     | (c) Consider use of a flow diagram                                                                                                                                                                           | Figure 1           |
| Descriptive data         | 14* | (a) Give characteristics of study participants (eg demographic, clinical, social) and information on exposures and potential confounders                                                                     | 8-9                |
|                          |     | (b) Indicate number of participants with missing data for each variable of interest                                                                                                                          | 9-14               |
|                          |     | (c) Summarise follow-up time (eg, average and total amount)                                                                                                                                                  | 9-14               |
| Outcome data             | 15* | Report numbers of outcome events or summary measures over time                                                                                                                                               | 8                  |
| Main results             | 16  | (a) Give unadjusted estimates and, if applicable, confounder-adjusted estimates and their precision (eg, 95% confidence interval). Make clear which confounders were adjusted for and why they were included | 9-14               |
|                          |     | (b) Report category boundaries when continuous variables were categorized                                                                                                                                    | 9-14               |
|                          |     | (c) If relevant, consider translating estimates of relative risk into absolute risk for a meaningful time period                                                                                             |                    |
| Other analyses           | 17  | Report other analyses done—eg analyses of subgroups and interactions, and sensitivity analyses                                                                                                               | 9-14, supplemental |
| <b>Discussion</b>        |     |                                                                                                                                                                                                              |                    |
| Key results              | 18  | Summarise key results with reference to study objectives                                                                                                                                                     | 14-18              |
| <b>Limitations</b>       |     |                                                                                                                                                                                                              |                    |
| Interpretation           | 20  | Give a cautious overall interpretation of results considering objectives, limitations, multiplicity of analyses, results from similar studies, and other relevant evidence                                   | 14-18              |
| Generalisability         | 21  | Discuss the generalisability (external validity) of the study results                                                                                                                                        | 18                 |
| <b>Other information</b> |     |                                                                                                                                                                                                              |                    |
| Funding                  | 22  | Give the source of funding and the role of the funders for the present study and, if applicable, for the original study on which the present article is based                                                | 5                  |

\*Give information separately for cases and controls in case-control studies and, if applicable, for exposed and unexposed groups in cohort and cross-sectional studies.

**Note:** An Explanation and Elaboration article discusses each checklist item and gives methodological background and published examples of transparent reporting. The STROBE checklist is best used in conjunction with this article (freely available on the Web sites of PLoS Medicine at <http://www.plosmedicine.org/>, Annals of Internal Medicine at <http://www.annals.org/>, and Epidemiology at <http://www.epidem.com/>). Information on the STROBE Initiative is available at [www.strobe-statement.org](http://www.strobe-statement.org).

# BMJ Open

## Association between Biomarkers and COVID-19 Severity and Mortality: A Nationwide Danish Cohort Study

|                                 |                                                                                                                                                                                                                                                                                                                                                                                                                                                                                                                                                                                                                                                                                                                                                                |
|---------------------------------|----------------------------------------------------------------------------------------------------------------------------------------------------------------------------------------------------------------------------------------------------------------------------------------------------------------------------------------------------------------------------------------------------------------------------------------------------------------------------------------------------------------------------------------------------------------------------------------------------------------------------------------------------------------------------------------------------------------------------------------------------------------|
| Journal:                        | <i>BMJ Open</i>                                                                                                                                                                                                                                                                                                                                                                                                                                                                                                                                                                                                                                                                                                                                                |
| Manuscript ID                   | bmjopen-2020-041295.R1                                                                                                                                                                                                                                                                                                                                                                                                                                                                                                                                                                                                                                                                                                                                         |
| Article Type:                   | Original research                                                                                                                                                                                                                                                                                                                                                                                                                                                                                                                                                                                                                                                                                                                                              |
| Date Submitted by the Author:   | 23-Sep-2020                                                                                                                                                                                                                                                                                                                                                                                                                                                                                                                                                                                                                                                                                                                                                    |
| Complete List of Authors:       | Hodges, Gethin; Herlev Hospital, Cardiology<br>Pallisgaard, Jannik; Gentofte Hospital Afdeling for Hjertesygdomme<br>Schjerning Olsen, Anne-Marie; Gentofte Hospital Afdeling for Hjertesygdomme<br>McGettigan, Patricia; Queen Mary University of London,<br>Andersen, Mikkel; Aalborg Universitetshospital, Unit of Clinical Biostatistics and Epidemiology & Department of Cardiology<br>Krogager, Maria; Aalborg Universitetshospital<br>Kragholm, Kristian; Aalborg Universitetshospital, Unit of Epidemiology and Biostatistics<br>Køber, Lars; Rigshospitalet, Department of Cardiology<br>Gislason, Gunnar<br>Torp-Pedersen, Christian; Nordsjællands Hospital, Department of Clinical Investigation and Cardiology<br>Bang, Casper N.; Rigshospitalet |
| <b>Primary Subject Heading</b>: | Infectious diseases                                                                                                                                                                                                                                                                                                                                                                                                                                                                                                                                                                                                                                                                                                                                            |
| Secondary Subject Heading:      | Infectious diseases, Intensive care                                                                                                                                                                                                                                                                                                                                                                                                                                                                                                                                                                                                                                                                                                                            |
| Keywords:                       | GENERAL MEDICINE (see Internal Medicine), INFECTIOUS DISEASES, Adult intensive & critical care < INTENSIVE & CRITICAL CARE                                                                                                                                                                                                                                                                                                                                                                                                                                                                                                                                                                                                                                     |
|                                 |                                                                                                                                                                                                                                                                                                                                                                                                                                                                                                                                                                                                                                                                                                                                                                |

SCHOLARONE™  
Manuscripts



I, the Submitting Author has the right to grant and does grant on behalf of all authors of the Work (as defined in the below author licence), an exclusive licence and/or a non-exclusive licence for contributions from authors who are: i) UK Crown employees; ii) where BMJ has agreed a CC-BY licence shall apply, and/or iii) in accordance with the terms applicable for US Federal Government officers or employees acting as part of their official duties; on a worldwide, perpetual, irrevocable, royalty-free basis to BMJ Publishing Group Ltd ("BMJ") its licensees and where the relevant Journal is co-owned by BMJ to the co-owners of the Journal, to publish the Work in this journal and any other BMJ products and to exploit all rights, as set out in our [licence](#).

The Submitting Author accepts and understands that any supply made under these terms is made by BMJ to the Submitting Author unless you are acting as an employee on behalf of your employer or a postgraduate student of an affiliated institution which is paying any applicable article publishing charge ("APC") for Open Access articles. Where the Submitting Author wishes to make the Work available on an Open Access basis (and intends to pay the relevant APC), the terms of reuse of such Open Access shall be governed by a Creative Commons licence – details of these licences and which [Creative Commons](#) licence will apply to this Work are set out in our licence referred to above.

Other than as permitted in any relevant BMJ Author's Self Archiving Policies, I confirm this Work has not been accepted for publication elsewhere, is not being considered for publication elsewhere and does not duplicate material already published. I confirm all authors consent to publication of this Work and authorise the granting of this licence.

1  
2  
3 **Association between Biomarkers and COVID-19 Severity and**  
4  
5  
6 **Mortality: A Nationwide Danish Cohort Study**  
7

8 Gethin Hodges, MBBS, Ph.D.<sup>a</sup>

9 Jannik Pallisgaard, MD, Ph.D.<sup>a</sup>

10 Anne-Marie Schjerning, MD, Ph.D.<sup>b, c</sup>

11 Patricia McGettigan, MD.<sup>d</sup>

12 Mikkel P. Andersen, MSPH, Ph.D.<sup>e</sup>

13 Maria L. Krogager, MD.<sup>f</sup>

14 Kristian Kragholm, MD, Ph.D.<sup>g</sup>

15 Lars Køber, MD, DMCs.<sup>h</sup>

16 Gunnar H. Gislason, MD, Ph.D.<sup>a, c</sup>

17 Christian Torp-Pedersen, MD, DMCs.<sup>i</sup>

18 Casper N. Bang, MD, Ph.D.<sup>c, i, j</sup>

19  
20  
21  
22  
23  
24  
25  
26  
27  
28  
29  
30  
31  
32  
33  
34 *a) Department of Cardiology, Copenhagen University Hospital Herlev and Gentofte,*  
35  
36 *Copenhagen, Denmark*

37  
38 *b) Department of Cardiology, Zealand University Hospital, Roskilde, Denmark*

39  
40  
41 *c) The Danish Heart Foundation, Copenhagen, Denmark*

42  
43  
44  
45 *d) William Harvey Research Institute, Barts and the London School of Medicine and Dentistry,*  
46  
47 *Queen Mary University of London, United Kingdom*

48  
49  
50  
51 *e) Unit of Clinical Biostatistics and Epidemiology & Department of Cardiology, Aalborg*  
52  
53 *University Hospital, Denmark*

54  
55  
56  
57  
58  
59  
60 *f) Department of Cardiology, Aalborg University Hospital, Aalborg, Denmark; Unit of*  
*Epidemiology and Biostatistics, Aalborg University Hospital, Aalborg, Denmark*



1  
2  
3  
4  
5  
6 *g) Department of Clinical Research, Nordsjaellands, Hospital, Hillerød, Denmark*

7  
8 *h) The Heart Centre, Rigshospitalet, University of Copenhagen, Copenhagen, Denmark*

9  
10 *i) Department of Cardiology, North Zealand University Hospital, Hillerød, Denmark*

11  
12 *j) Department of Cardiology, Bispebjerg-Frederiksberg Hospital, University of Copenhagen,*  
13  
14 *Copenhagen, Denmark*

15  
16  
17 Correspondence to: Dr. Gethin Hodges, Herlev Hospital, Herlev Ringvej 75

18  
19 2730 Herlev, Copenhagen, Denmark.

20  
21 Fax: +45 3867 7654. Phone: +45 3868 3868.

22  
23 E-mail: [gethin.william.hodges@regionh.dk](mailto:gethin.william.hodges@regionh.dk)

24  
25  
26 Word count: 6158

## Abstract

**Objective:** To evaluate the association between common biomarkers, death and ICU admission in patients with COVID-19.

**Design:** Retrospective cohort study. From electronic national registry data, we used Cox analysis and bootstrapping to evaluate associations between baseline levels of biomarkers and standardized absolute risks of death/ICU admission, adjusted for age and gender.

**Setting:** All hospitals in Denmark.

**Participants:** 1310 patients aged  $\geq 18$  years admitted to hospital with COVID-19 from February 27<sup>th</sup> to May 1<sup>st</sup>, 2020, with available biochemistry data.

**Main outcome measures:** A composite of death / ICU admission occurring within 30-days.

**Results:** Of the 1310 patients admitted to hospital (54.6% male; median age 73.6), 352 (26.9%) experienced the composite endpoint and 263 (20.1%) died. For the composite endpoint, the absolute risks for moderately and severely elevated C-reactive protein (CRP) were significantly higher, 21.5% and 39.2% respectively, compared to 5.0% for those with normal CRP.

Moderately and severely elevated leucocytes were significantly higher, 34.5% and 46.6% risk respectively, compared to 23.2% for those with normal leucocytes. Moderately and severely decreased estimated glomerular filtration rate (eGFR) were significantly higher, 41.5% and 45.9% risk respectively, compared to 30.4% for those with normal/mildly decreased eGFR.

Normal and elevated urea were significantly higher, 22.3% and 40.6% risk respectively, compared to 7.3% for those with low urea. Elevated D-dimer was significantly higher, 31.8% risk, compared to 17.5% for those with normal D-dimer. Moderately and severely elevated troponins were significantly higher, 27.7% and 57.3% risk respectively, compared to 9.4% for

1  
2  
3 those with normal troponin. Elevated procalcitonin was significantly higher, 52.1% risk,  
4  
5 compared to 28.0% for those with normal procalcitonin.  
6

7  
8 **Conclusion:** In this nationwide study of patients admitted with COVID-19, elevated levels of  
9  
10 CRP, leucocytes, procalcitonin, urea, troponins and D-dimer, and low levels of eGFR were  
11  
12 associated with higher standardized absolute risk of death/ICU admission within 30 days.  
13  
14

### 15 16 17 **Strengths and limitations of this study**

- 18  
19 • Much of the research concerning COVID-19 describes small case studies from China and  
20  
21 Italy, without clearly defined outcomes.  
22
- 23  
24 • This study is the first to report the standardized absolute risk of individual laboratory tests  
25  
26 on short-term mortality and ICU admission in a relatively large, European cohort of 1310  
27  
28 patients with COVID-19.  
29
- 30  
31 • Our study can help the clinician to understand which biomarkers are important in  
32  
33 identifying patients with poor prognosis, which may be useful to assess disease severity  
34  
35 or to enable early intervention.  
36
- 37  
38 • The main limitation of our study is its observational, non-randomized design.  
39
- 40  
41 • This study included only patients admitted to the hospital with COVID-19 and measured  
42  
43 biochemical data, hence it is likely to represent symptomatic patients at the more severe  
44  
45 end of the disease spectrum.  
46  
47  
48  
49  
50  
51  
52  
53  
54  
55  
56  
57  
58  
59  
60

## Introduction

Coronavirus disease 2019 (COVID-19) caused by the novel coronavirus, severe acute respiratory syndrome coronavirus-2 (SARS-CoV-2), has spread rapidly to become a worldwide pandemic resulting in an enormous strain on healthcare systems globally. As of September 20th, 2020, the number of confirmed cases has surpassed 30 million, affecting 213 countries, although the actual number is likely to be much higher.<sup>1</sup> The clinical course of COVID-19 is variable, but is typically characterized by an initial phase with fever or mild upper respiratory symptoms (though many are asymptomatic). Among hospitalized patients, those with a poor prognosis tend to develop severe viral pneumonia requiring ventilatory support and intensive care unit (ICU) admission.<sup>2</sup> Despite supportive care, a high proportion of patients with COVID-19 suffer rapid deterioration with respiratory failure and death.<sup>3-5</sup> Identifying which patients are at risk of severe disease or death, may be useful in decision making, to determine whether hospitalization or ICU referral is required or to enable early intervention.<sup>6</sup> This is of particular importance given that the fast-pace of the pandemic has led to rationing of scarce resources, most notably mechanical ventilators.<sup>7</sup>

Several studies have demonstrated that older age and chronic diseases are associated with poor outcome in patients with COVID-19.<sup>2,5</sup> Furthermore, in a recently published systematic review, disease severity was associated with more prominent laboratory abnormalities including markers of inflammation and organ damage including elevated troponins, although much of the early research describes small case studies without clearly defined outcomes and the need for further research in more varied cohorts was highlighted.<sup>2,8-11</sup> A recently published study showed that in multivariate analysis, older age, higher Sequential Organ Failure Assessment (SOFA) score, and elevated D-dimer on admission were independently associated with in-hospital death.<sup>5</sup>

1  
2  
3 The present study aims to expand on these findings and evaluate which biomarkers are  
4 associated with death and ICU admission in a large nationwide cohort.  
5  
6  
7  
8  
9

## 10 **Methods**

### 11 *Data sources*

12  
13  
14 This study is based on four nationwide registers, The Danish National Patient Register,  
15 The Civil Registration System, The Danish Registry of Medicinal Product Statistics, and the  
16 database on blood samples (LABKA). These four nationwide registers were cross-linked on the  
17 individual level using the unique permanent identification number given to all Danish residents  
18 at birth or migration.  
19  
20  
21  
22  
23  
24  
25

26 The Danish National Patient Register holds information on every hospital visit in  
27 Denmark, in which each visit is registered with a diagnosis according to the International  
28 Classification of Diseases, the 10th revision (ICD-10). The Civil Registration System holds  
29 information on the day of birth, sex, and vital status. The Danish Registry of Medicinal Product  
30 Statistics contains information on all prescriptions dispensed from Danish pharmacies and is  
31 coded according to the Anatomical Therapeutic Chemical (ATC) classification system.<sup>12</sup> The  
32 LABKA database holds information on blood samples from all hospital visits, including the  
33 emergency departments, outpatient consultations, and admissions to the hospital.  
34  
35  
36  
37  
38  
39  
40  
41  
42  
43  
44  
45  
46

### 47 *Study design and participants*

48  
49 This study included all laboratory-confirmed COVID-19 patients aged 18 years and older  
50 with available biochemistry data, admitted to hospital between February 27<sup>th</sup>, 2020, and May 1<sup>st</sup>,  
51 2020 (the first Danish case was recorded on February 27<sup>th</sup>, 2020). Patients were included on the  
52  
53  
54  
55  
56  
57  
58  
59  
60

1  
2  
3 first day of diagnosis with COVID-19 and followed for 30 days for the combined endpoint of all-  
4 cause mortality and ICU admission. A sub-analysis was also performed for the endpoint of all-  
5 cause mortality alone. Blood test results were obtained from electronic registries of laboratory  
6 data, with baseline values taken on admission (measured within 24 hours). We focused on  
7 readily available laboratory tests associated with inflammation or organ damage, including C-  
8 reactive protein (CRP), ferritin, procalcitonin, leucocyte count, estimated glomerular filtration  
9 rate (eGFR), urea, alanine aminotransferase (ALAT), D-dimer and troponin (both T and I). The  
10 eGFR was calculated using the Modification of Diet in Renal Disease (MDMD) equation, which  
11 includes creatinine level, age, race, and sex. In order to compare troponin values with different  
12 assays and reference values, a ratio between observed values and highest reference values was  
13 performed.  
14  
15  
16  
17  
18  
19  
20  
21  
22  
23  
24  
25  
26  
27  
28  
29  
30

### 31 **Statistical analysis**

32  
33 Categorical data were presented as counts with percentages, and the statistical difference  
34 was tested using Fisher's exact test. Continuous variables were presented as medians with the  
35 first and third quartile (Q1 and Q3), and the statistical difference was tested using the Wilcoxon  
36 rank-sum test. Cox analysis and bootstrapping with 100 bootstraps were used to derive age and  
37 gender adjusted standardized absolute risk and average treatment effects curves with 95%  
38 confidence intervals (CI) to evaluate the association between individual biomarkers and the 30-  
39 day risk for each endpoint. The above analysis was repeated with stratification by typical  
40 normal/elevated ranges used in the clinical setting. For the stratified analysis of troponin the  
41 cutoff values were defined as being moderately elevated (>1 to 2 times elevated) and severely  
42 elevated (>two times elevated), relative to baseline troponin. As part of a sensitivity analysis, we  
43  
44  
45  
46  
47  
48  
49  
50  
51  
52  
53  
54  
55  
56  
57  
58  
59  
60

1  
2  
3 performed a Cox multivariate regression analysis to assess CRP in relation to the combined  
4  
5 endpoint of all-cause mortality and ICU admission (adjusted for age, gender, diabetes, chronic  
6  
7 obstructive pulmonary disease, hypertension and ischemic heart disease). A two-sided p-value  
8  
9  $\leq 0.05$  was considered statistically significant.  
10

11  
12 Data management and statistical analyses were conducted using R statistics (R Core  
13  
14 Team (2020). R: A language and environment for statistical computing. R Foundation for  
15  
16 Statistical Computing, Vienna, Austria. URL <https://www.R-project.org/>).  
17  
18  
19  
20

## 21 **Results**

22  
23 A total of 4444 patients with COVID-19 were identified in the study period. We excluded  
24  
25 28 patients aged below 18 years old, 2653 patients who were not admitted to hospital and 453  
26  
27 with no available biochemistry data, leaving 1310 patients for inclusion in the study (54.6%  
28  
29 male; median age 73.6). Of these, 352 (26.9%) patients experienced the composite endpoint and  
30  
31 263 (20.1%) died (See Figure 1).  
32  
33  
34

35  
36 Baseline characteristics for the total cohort and stratified by the composite endpoint, are  
37  
38 given in Table 1 (see also Table S1 for baseline characteristics stratified by death and Table S2  
39  
40 stratified according to availability of biochemistry). Patients who experienced the composite  
41  
42 endpoint of death/ICU admission within 30-days were more likely to be older, male, with a pre-  
43  
44 existing comorbidity (diabetes, chronic obstructive pulmonary disease, atrial fibrillation,  
45  
46 hypertension or heart failure); currently receiving treatment with aspirin, beta-blocker,  
47  
48 angiotensin II receptor blockers, loop diuretics, calcium channel blockers, or spironolactone;  
49  
50 with higher baseline values of leucocytes, urea, D-dimer, troponin or procalcitonin; or lower  
51  
52 baseline values of eGFR ( $p \leq 0.044$  for all). However, the proportion of patients who died or were  
53  
54  
55  
56  
57  
58  
59  
60

1  
2  
3 admitted to ICU was not significantly different for those with prior ischemic stroke, ischemic  
4 heart disease, chronic kidney disease, cancer, or currently receiving treatment with nonsteroidal  
5 anti-inflammatory drugs or thiazides.  
6  
7  
8  
9

## 10 11 12 ***Biomarkers and Standardized Absolute Risk of Death and Intensive Care Unit Admission***

### 13 14 15 *C-reactive protein*

16  
17 Higher baseline CRP was associated with higher age and sex adjusted absolute risk of  
18 death/ICU admission (Figure 2), and death alone (Supplementals, Figure S1).

19  
20 In stratified analysis, moderately elevated (upper reference limit to 99 mmol/L) and  
21 severely elevated (100 to 400 mmol/L) baseline CRP were associated with an age and sex  
22 adjusted absolute risk of 21.5% (95%CI: 18.1-24.9) and 39.2% (95%CI: 35.6-43.0) for  
23 death/ICU admission within 30 days, respectively, which was a significantly higher risk (both  
24 p<0.001) compared to those with normal CRP, absolute risk 5.0% (95%CI: 0.0-12.0) (Figure 3).

25  
26 Similarly, moderately and severely elevated baseline CRP were associated with an age  
27 and sex adjusted absolute risk of 18.1% (95%CI: 15.1-21.3) and 28.8% (95%CI: 25.4-32.1) for  
28 30-day mortality, respectively, which was a significantly higher risk (both p<0.001) compared to  
29 those with normal CRP, absolute risk 6.6% (95%CI: 0.0-15.0) (Supplementals, Figure S2).

30  
31 In a multivariate model, elevated CRP was independently associated with death/ICU  
32 admission after adjusting for age, gender, diabetes, chronic obstructive pulmonary disease,  
33 hypertension and ischemic heart disease (Figure 4; Supplementals, Table S3).  
34  
35  
36  
37  
38  
39  
40  
41  
42  
43  
44  
45  
46  
47  
48  
49  
50

### 51 52 *Leucocytes*



1  
2  
3 Higher baseline leucocyte count was associated with higher age and sex adjusted absolute  
4 risk of death/ICU admission (Figure 2), and death alone (Supplementals, Figure S1).  
5  
6

7  
8 In stratified analysis, moderately elevated (upper reference limit to  $15 \times 10^9/L$ ) and  
9 severely elevated ( $15$  to  $30 \times 10^9/L$ ) baseline leucocytes were associated with an age and sex  
10 adjusted absolute risk of 34.5% (95%CI: 29.5-39.4) and 46.6% (95%CI: 38.5-54.6) for  
11 death/ICU admission within 30 days, respectively, which was a significantly higher risk (both  
12  $p < 0.001$ ) compared to those with normal leucocytes, absolute risk 23.2% (95%CI: 20.4-22.2)  
13 (Figure 3).  
14  
15  
16  
17  
18  
19  
20  
21

22 In stratified analysis, moderately and severely elevated baseline leucocytes were  
23 associated with an age and sex adjusted absolute risk of 26.6% (95%CI: 22.0-31.3) and 37.0%  
24 (95%CI: 25.4-32.1) for 30 day-mortality, respectively, which was a significantly higher risk  
25 (both  $p < 0.001$ ) compared to those with normal leucocytes, absolute risk 17.6% (95%CI: 15.0-  
26 20.2) (Supplementals, Figure S2).  
27  
28  
29  
30  
31  
32  
33  
34

### 35 *Estimated glomerular filtration rate*

36  
37 Lower baseline eGFR was associated with higher age and sex adjusted absolute risk of  
38 death/ICU admission (Figure 2), and death alone (Supplementals, Figure S1).  
39  
40  
41

42 In stratified analysis, moderately decreased (30 to 60 mmol/L) and severely decreased (0  
43 to 30 mmol/L) baseline eGFR were associated with an age and sex adjusted risk risk of 41.5%  
44 (95%CI: 35.1-48.0) and 45.9% (95%CI: 34.9-56.8) for death/ICU admission within 30 days,  
45 respectively, which was a significantly higher risk (both  $p < 0.001$ ) compared to those with  
46 normal/mild decreased eGFR ( $>60$  mmol/L), absolute risk 30.4% (95%CI: 26.7-34.1) (Figure 3).  
47  
48  
49  
50  
51  
52  
53  
54  
55  
56  
57  
58  
59  
60

1  
2  
3 In stratified analysis, moderately elevated and severely elevated baseline leucocytes were  
4 associated with an absolute risk of 34.8% (95%CI: 29.0-40.5) and 42.4% (95%CI: 32.9-52.0) for  
5 30-day mortality, respectively, (Figure 3), which was a significantly higher risk (both  $p < 0.001$ )  
6 compared to those with normal/mild decreased eGFR, absolute risk 22.0% (95%CI: 18.5-25.5)  
7 (Supplementals, Figure S2).  
8  
9  
10  
11  
12  
13

### 14 15 16 17 *Urea*

18  
19 Higher baseline urea was associated with higher age and sex adjusted absolute risk of  
20 death/ICU admission (Figure 2), and death alone (Supplementals, Figure S1).  
21  
22

23  
24 In stratified analysis, normal (3.6 to 8.0 mmol/L) and elevated ( $>8$  mmol/L) baseline urea  
25 were associated with an absolute risk of 22.3% (95%CI: 18.7-25.9) and 40.6% (95%CI: 35.5-  
26 45.7) for death/ICU admission within 30 days, respectively, which was a significantly higher risk  
27 (both  $p < 0.001$ ) compared to those with low urea, absolute risk 7.3% (95%CI: 1.6-12.9) (Figure  
28 3).  
29  
30  
31  
32  
33  
34

35  
36 In stratified analysis, normal and elevated baseline urea were associated with an absolute  
37 risk of 15.7% (95%CI: 11.2-17.4) and 31.9% (95%CI: 26.8-35.4) for 30-day mortality,  
38 respectively, which was a significantly higher risk (both  $p < 0.001$ ) compared to those with low  
39 urea, absolute risk 5.4% (95%CI: 0.0-11.0) (Supplementals, Figure S2).  
40  
41  
42  
43  
44  
45

### 46 47 *Alanine aminotransferase*

48  
49 Higher baseline ALAT was associated with slightly higher absolute risk of death/ICU  
50 admission (Figure 2), and death alone (Supplementals, Figure S1).  
51  
52  
53  
54  
55  
56  
57  
58  
59  
60

1  
2  
3 In stratified analysis, elevated (>upper reference limit) baseline ALAT was associated  
4 with an absolute risk of 36.9% (95%CI: 30.7-43.1) for death/ICU admission within 30 days,  
5 which was significantly higher than normal ALAT (10 U/L to upper reference limit), absolute  
6 risk 26.9% (95%CI: 23.6-29.3, p=0.002), however not significantly different to low ALAT (<10  
7 U/L), absolute risk 43.8% (95%CI: 21.1-66.4) (Figure 3).  
8  
9  
10  
11  
12  
13

14 In stratified analysis, low baseline ALAT was associated with an absolute risk of 41.0%  
15 (95%CI: 22.7-59.4) for 30-day mortality, which was significantly higher than normal ALAT,  
16 absolute risk 20.8% (95%CI: 18.2-23.4, p=0.03), however not significantly different to high  
17 ALAT, absolute risk 25.8% (95%CI: 19.9-31.8) (Supplementals, Figure S2).  
18  
19  
20  
21  
22  
23

### 24 25 26 *Ferritin*

27  
28 Higher baseline ferritin was associated with an inverted U shaped risk of death/ICU  
29 admission (Figure 2), and risk of death alone (Supplementals, Figure S1).  
30  
31  
32

33 In stratified analysis, elevated (> 300 mmol/L) baseline ferritin was associated with an  
34 age and sex adjusted absolute risk of 22.7% (95%CI: 15.1-30.3) for death/ICU admission within  
35 30 days, which was not a significantly higher risk compared to those with normal ferritin ( $\leq$ 300  
36 mmol/L), absolute risk 19.7% (95%CI: 12.5-32.9) (Figure 3).  
37  
38  
39  
40  
41

42 In stratified analysis, elevated (>300 mmol/L) baseline ferritin was associated with an age  
43 and sex adjusted risk of 15.9% (95%CI: 0.09-22.8) for 30-day mortality, which was not a  
44 significantly higher risk compared to those with normal ferritin ( $\leq$ 300 mmol/L), absolute risk  
45 19.8% (95%CI: 12.6-26.9) (Supplementals, Figure S2).  
46  
47  
48  
49  
50  
51

### 52 53 54 *D-dimer*

1  
2  
3 Higher baseline D-dimer was associated with an age and sex adjusted higher risk of  
4 death/ICU admission (Figure 2), and risk of death alone (Supplementals, Figure S1).  
5  
6

7  
8 In stratified analysis, elevated (>0.5 mg/L) baseline D-dimer was associated with an age  
9 and sex adjusted absolute risk of 31.8% (95%CI: 26.7-36.8) for death/ICU admission within 30  
10 days, which was a significantly higher risk ( $p<0.001$ ) compared to those with normal D-dimer,  
11 absolute risk 17.5% (95%CI: 10.9-24.1) (Figure 3).  
12  
13  
14

15  
16 In stratified analysis, elevated baseline D-dimer was associated with an age and sex  
17 adjusted risk of 19.1% (95%CI: 14.7-23.5) for 30-day mortality, which was a significantly higher  
18 risk ( $p<0.001$ ) compared to those with normal D-dimer, absolute risk 13.5% (95%CI: 8.5-19.5)  
19 (Supplementals, Figure S2).  
20  
21  
22  
23  
24  
25

### 26 27 28 *Troponin* 29

30  
31 Higher baseline troponin ratio was associated with age and sex adjusted higher risk of  
32 death/ICU admission (Figure 2), and risk of death alone (Supplementals, Figure S1).  
33  
34

35  
36 In stratified analysis, moderately elevated and severely elevated baseline troponin were  
37 associated with an age and sex adjusted absolute risk of 27.7% (95%CI: 16.5-38.9) and 57.3%  
38 (95%CI: 43.3-71.3) for death/ICU admission within 30 days, respectively, which was a  
39 significantly higher absolute risk ( $p=0.003$  and  $p<0.001$ , respectively) compared to those with  
40 normal troponins, absolute risk 9.4% (95%CI: 4.2-14.5) (Figure 3).  
41  
42  
43  
44  
45

46  
47 In stratified analysis, moderately elevated and severely elevated baseline troponin were  
48 associated with an age and sex adjusted absolute risk of 10.8% (95%CI: 3.2-18.5) and 35.9%  
49 (95%CI: 23.2-48.6) for 30-day mortality, respectively. However, only the later was a  
50  
51  
52  
53  
54  
55  
56  
57  
58  
59  
60

1  
2  
3 significantly higher risk ( $p<0.001$ ) compared to those with normal troponins, absolute risk 3.9%  
4  
5 (95%CI: 0.0-8.7) (Supplementals, Figure S2).  
6  
7  
8  
9

### 10 *Procalcitonin*

11  
12 Higher baseline procalcitonin was associated with age and sex adjusted higher risk of  
13 death/ICU admission (Figure 2), and risk of death alone (Supplementals, Figure S1).  
14

15  
16 In stratified analysis, elevated ( $>0.5$  mcg/L) baseline procalcitonin was associated with an  
17 age and sex adjusted risk of 52.1% (95%CI: 41.5-62.6) for death/ICU admission within 30 days,  
18  
19 which was a significantly higher risk ( $p<0.001$ ) compared to those with normal procalcitonin,  
20  
21 absolute risk 28.0% (95%CI: 21.1-34.9) (Figure 3).  
22  
23  
24  
25

26 In stratified analysis, elevated baseline procalcitonin was associated with an age and sex  
27 adjusted absolute risk of 29.5% (95%CI: 19.9-39.0) for 30-day mortality, which was a  
28  
29 significantly higher absolute risk ( $p=0.03$ ) compared to those with normal procalcitonin, absolute  
30  
31 risk 18.0% (95%CI: 12.0-24.0) (Supplementals, Figure S2).  
32  
33  
34  
35  
36  
37

### 38 **Discussion**

39  
40 This nationwide study is the first of its kind to examine the association between common  
41 biomarkers and risk of early death and ICU admission in adult patients admitted to hospital with  
42 laboratory-confirmed COVID-19. In particular, the inflammatory markers CRP, leucocytes and  
43  
44 procalcitonin, and markers of organ damage including eGFR, troponins and D-dimer are  
45  
46 associated with higher risk of death/ICU admission within 30 days. However, the association  
47  
48 between ferritin and ALAT was non-significant.  
49  
50  
51  
52  
53  
54  
55  
56  
57  
58  
59  
60

1  
2  
3 The novelty of the SARS-CoV-2, coupled with the rapid spread of the COVID-19  
4  
5 pandemic, has led to a tremendous burden on healthcare systems worldwide. To provide optimal  
6  
7 care for patients, early diagnosis and identification of vulnerable patients who are at risk of  
8  
9 severe disease is needed, as well as recognizing patients who may rapidly deteriorate and require  
10  
11 ICU admission and mechanical ventilation. This relies on an accurate knowledge of the critical  
12  
13 clinical predictors for disease progression in order to triage patients and allocate scarce resources  
14  
15 efficiently. This is especially important when considering which patients should start treatment.  
16  
17 For example, in the first trial to offer an effective treatment for COVID-19 disease, results  
18  
19 showed that early administration of antiviral treatment with Remdesivir was superior to placebo  
20  
21 in reducing time to recovery and in particular, the authors highlighted the need to start antiviral  
22  
23 treatment before pulmonary disease progresses to require mechanical ventilation.<sup>13</sup>  
24  
25  
26  
27

28 In the present study, patients who died or were admitted to ICU were more likely to be  
29  
30 older, male, and with a pre-existing comorbidity which is consistent with observed global trends.  
31  
32 Our results are aligned with a recent large cohorts of patients hospitalized with COVID-19 in the  
33  
34 UK and US, as well as meta-analysis of studies from China.<sup>2,14</sup> The median age of patients who  
35  
36 died in our study was 81 years, similar to the values noted in the UK study (median 80 years) but  
37  
38 much older compared to patients included in the early studies from the Wuhan region. Similarly,  
39  
40 we reported a greater proportion death/ICU admission among males (64%) and patients with pre-  
41  
42 existing comorbidity (prior diabetes, COPD, atrial fibrillation and hypertension). Differences are  
43  
44 most likely due to a variety of factors including regional differences concerning demographics,  
45  
46 preparedness and knowledge of COVID-19 that have drawn on experience from China and other  
47  
48 countries as the outbreak has spread.  
49  
50  
51  
52  
53  
54  
55  
56  
57  
58  
59  
60

1  
2  
3 In terms of clinical laboratory biomarkers, recent systematic reviews of the literature  
4 have highlighted many of the challenges inherent in the early studies of COVID-19, as many of  
5 the early studies are limited by the small size of the study populations with regional bias (most  
6 data is confined to China and Italy), and with limited or poorly defined outcomes.<sup>6,11</sup> Several  
7 studies have evaluated level of individual biomarkers in small and selected COVID cohorts. An  
8 Italian study including 239 patients, reported that several laboratory parameters including  
9 elevated lymphocytes, procalcitonin, interleukin-6, ferritin, CRP, and ALAT was associated with  
10 death and ICU admission in unadjusted Cox analysis. However, in adjusted analysis CRP was  
11 the only biomarker associated with increased risk of death/ICU admission.<sup>15</sup>  
12  
13  
14  
15  
16  
17  
18  
19  
20  
21  
22  
23

24 An early meta-analysis identified a range of abnormal biomarkers that was elevated in  
25 COVID-19 patients who died, including elevated levels of inflammatory markers and acute  
26 phase reactants such as interleukin-6, CRP, ferritin, lymphopenia, as well as reduced CD4 and  
27 CD8 counts and coagulation abnormalities including prolonged PT, increased D-dimer and  
28 thrombocytopenia.<sup>16</sup> We were able to expand on these findings, reporting age and gender  
29 adjusted absolute risk of death/ICU admission of individual biomarkers in a larger, European  
30 cohort. In the present study inflammatory markers such as CRP, leucocytes and procalcitonin,  
31 and markers of organ damage including eGFR, urea, troponins and D-dimer were associated with  
32 higher risk of death/ICU admission within 30 days. However, the association between ferritin  
33 and ALAT was non-significant. The association with inflammatory markers, and acute phase  
34 reactants likely reflects the cytokine storm associated with severe infection and subsequent end-  
35 organ damage from severe sepsis.<sup>17</sup> However, it is also essential to recognize that the acute phase  
36 reactants are non-specific markers of inflammation. For example, procalcitonin secretion is not  
37 induced by gamma-interferon (produced mainly in response to viral infections), making it  
38  
39  
40  
41  
42  
43  
44  
45  
46  
47  
48  
49  
50  
51  
52  
53  
54  
55  
56  
57  
58  
59  
60

1  
2  
3 primarily an attractive marker of bacterial infections.<sup>18</sup> Nevertheless, bacterial superinfection is  
4 an important consideration in COVID-19; for example, in the study by Wang et al., 81.7% of  
5 patients who died with COVID-19 had an associated bacterial infection.<sup>19</sup> Probably, patients with  
6 longer and more complex admissions or ICU treatment are more vulnerable to secondary  
7 infections e.g. ventilator acquired infection, with an expected rise in procalcitonin levels.  
8 Accordingly, Zhou et al. observed that half of the non-survivors experienced a secondary  
9 infection, with almost a third due to ventilator-associated pneumonia.<sup>5</sup> However, the association  
10 between higher absolute risk of death/ICU admission and elevated baseline procalcitonin in the  
11 present study suggests that early concomitant bacterial infection (not only secondary infection) is  
12 a significant factor in adverse prognosis for patients with COVID-19 that clinicians should be  
13 aware of.  
14  
15  
16  
17  
18  
19  
20  
21  
22  
23  
24  
25  
26  
27

28 In the study including 191 patients from Wuhan region, leucocytes, older age, higher  
29 Sequential Organ Failure Assessment (SOFA) score, and a higher D-dimer (greater than 1 µg/L  
30 on admission) were all associated with in-hospital mortality in patients with COVID-19.<sup>5</sup>  
31 Although the SOFA score is mainly a diagnostic marker of sepsis and septic shock, it may reflect  
32 the state and degree of multi-organ dysfunction due to infection in general.<sup>20</sup> In the present study,  
33 abnormal values of biomarkers reflecting organ damage including troponin, eGFR, urea, and D-  
34 dimer were all associated with higher absolute risk of 30-day mortality and ICU admission.  
35 Myocarditis is a known morbidity amongst patients with COVID-19.<sup>21</sup> Elevated troponin may  
36 reflect myocardial injury among COVID-19 patients, including direct damage to the  
37 cardiomyocytes, systemic inflammation, myocardial interstitial fibrosis, coronary plaque  
38 destabilization and hypoxia.<sup>21</sup> Furthermore, patients with cardiovascular disease are more likely  
39 to be admitted with COVID-19, with greater risk of cardiac involvement as their symptoms  
40  
41  
42  
43  
44  
45  
46  
47  
48  
49  
50  
51  
52  
53  
54  
55  
56  
57  
58  
59  
60



1  
2  
3 develop.<sup>22</sup> With respect to the abnormalities observed in D-dimer, research suggests that  
4  
5 respiratory failure in COVID-19 is not only related to development of the acute respiratory  
6  
7 distress syndrome (ARDS), but also due to microvascular thrombotic processes, which are  
8  
9 associated with elevated D-dimer.<sup>23</sup> Finally, beyond the high mortality observed in those with  
10  
11 organ dysfunction and respiratory failure, a generalized coagulopathy has also been noted in  
12  
13 those with poor prognosis.<sup>24</sup>  
14  
15

### 16 17 18 19 **Strengths and limitations:** 20

21  
22 The main strength of this study is the completeness of data from a nationwide, European  
23  
24 cohort and the avoidance of selection bias resulting from race, age, sex, socioeconomic status,  
25  
26 affiliation to selected hospitals, or healthcare systems. The Danish National Patient Registry and  
27  
28 the Danish Registry of Medicinal Product Statistics are known to be accurate.<sup>25,26</sup> The main  
29  
30 limitation of our study is its observational non-randomized design. There is a lack of information  
31  
32 about important clinical parameters, including blood pressure, body mass index, and smoking  
33  
34 habits.  
35  
36

37  
38 This study included only patients admitted to the hospital with COVID-19 and with  
39  
40 measured baseline biochemical data. Therefore, it is likely to represent symptomatic patients,  
41  
42 who are more likely to be elderly or with more comorbidities and at the more severe end of the  
43  
44 disease spectrum. Furthermore, patients in the cohort may present to hospital at differing stages  
45  
46 of their disease. A large proportion of patients with confirmed COVID-19 in Denmark had  
47  
48 missing biochemistry data, which most likely represents patients who attended the emergency  
49  
50 room with mild symptoms, which did not warrant admission or blood tests, and were not  
51  
52 included in this study, thus leading to selection bias and limiting generalisability. Some  
53  
54  
55  
56  
57  
58  
59  
60

1  
2  
3 biomarkers (particularly D-dimer, troponin and procalcitonin) are likely to be measured in those  
4  
5 with the most severe disease (confounding by indication).  
6  
7  
8  
9

## 10 11 **Conclusions:**

12  
13 In this nationwide study of patients admitted with COVID-19, elevated levels of CRP,  
14  
15 leucocytes, procalcitonin, urea, troponins and D-dimer, and low levels of eGFR were associated  
16  
17 with higher standardized absolute risk of death/ICU admission within 30 days.  
18  
19  
20  
21  
22

## 23 **Footnotes**

24  
25 **Contributors:** Authors GH, JP, AMS, PM, MA, MK, KK, LK, GG, CTP, CB made substantial  
26  
27 contributions to the conception and design of the work. Author JP was primarily responsible for  
28  
29 the acquisition and analysis, and authors CB, GH and JP were primarily responsible for  
30  
31 interpretation of data for the work. All authors were involved in the drafting, revision and final  
32  
33 approval of the published version and agree to be accountable for all aspects of the work.  
34  
35  
36  
37  
38  
39

## 40 **Funding**

41  
42 This research received no specific grant from any funding agency in the public, commercial or  
43  
44 not-for-profit sectors.  
45  
46  
47  
48

49 **Competing interests:** All authors have completed the ICMJE uniform disclosure form  
50  
51 at [www.icmje.org/coi\\_disclosure.pdf](http://www.icmje.org/coi_disclosure.pdf) and declare: no support from any organization for the  
52  
53 submitted work; no competing interests with regards to the submitted work.  
54  
55  
56  
57  
58  
59

1  
2  
3 **Ethical approval:** In Denmark, retrospective register studies do not require approval from the  
4 ethics committees or individual informed consent. The data responsible institute (The Capital  
5 Region of Denmark) approved this study (ref. no.: P-2019-191), in line with the General Data  
6 Protection Regulation (GDPR) and The Data Protection Act. Data were made available in a  
7 pseudonymized format such that specific individuals could not be identified. Dissemination to  
8 study patients is not possible/applicable.  
9  
10  
11  
12  
13  
14  
15  
16  
17  
18

19 **Patient and Public Involvement:** This research was done without patient involvement. Patients  
20 were not invited to comment on the study design and were not consulted to develop patient  
21 relevant outcomes or interpret the results. Patients were not invited to contribute to the writing or  
22 editing of this document for readability or accuracy.  
23  
24  
25  
26  
27  
28  
29  
30

31 **Transparency declaration:** The lead authors affirm that the manuscript is an honest, accurate,  
32 and transparent account of the study being reported; that no important aspects of the study have  
33 been omitted; and that any discrepancies from the study as planned have been explained.  
34  
35  
36  
37  
38  
39

40 **Data availability statement:** No additional data are available.  
41  
42  
43  
44  
45  
46  
47  
48  
49  
50  
51  
52  
53  
54  
55  
56  
57  
58  
59  
60

1. World Health Organization. Coronavirus disease (COVID-19) outbreak (<https://www.who.int>).
2. Guan, W. *et al.* Clinical Characteristics of Coronavirus Disease 2019 in China. *N. Engl. J. Med.* (2020). doi:10.1056/nejmoa2002032
3. Yang, X. *et al.* Articles Clinical course and outcomes of critically ill patients with SARS-CoV-2 pneumonia in Wuhan, China: a single-centered, retrospective, observational study. (2020). doi:10.1016/S2213-2600(20)30079-5
4. Inciardi, R. M. *et al.* Cardiac Involvement in a Patient with Coronavirus Disease 2019 (COVID-19). *JAMA Cardiol.* (2020). doi:10.1001/jamacardio.2020.1096
5. Zhou, F. *et al.* Articles Clinical course and risk factors for mortality of adult inpatients with COVID-19 in Wuhan, China: a retrospective cohort study. (2020). doi:10.1016/S0140-6736(20)30566-3
6. Wynants, L. *et al.* Prediction models for diagnosis and prognosis of covid-19 infection: systematic review and critical appraisal What is already known on this topic. doi:10.1136/bmj.m1328
7. Truog, R. D., Mitchell, C. & Daley, G. Q. The Toughest Triage — Allocating Ventilators in a Pandemic. *N. Engl. J. Med.* (2020). doi:10.1056/nejmp2005689
8. Huang, C. *et al.* Clinical features of patients infected with 2019 novel coronavirus in Wuhan, China. *www.thelancet.com* **395**, 497 (2020).
9. Chen, N. *et al.* Epidemiological and clinical characteristics of 99 cases of 2019 novel coronavirus pneumonia in Wuhan, China: a descriptive study. *Lancet* **395**, 507–513 (2020).
10. Lippi, G., Lavie, C. J. & Sanchis-Gomar, F. Cardiac troponin I in patients with coronavirus disease 2019 (COVID-19): Evidence from a meta-analysis. *Progress in Cardiovascular Diseases* (2020). doi:10.1016/j.pcad.2020.03.001
11. Kermali M, Khalsa RK, Pillai K, et al. The role of biomarkers in diagnosis of COVID-19 - A systematic review. *Life Sci.* 2020;254:117788. doi:10.1016/j.lfs.2020.117788
12. Andersen, T. F., Madsen, M., Jørgensen, J., Mellekjær, L. & Olsen, J. H. The Danish National Hospital Register. A valuable source of data for modern health sciences. *Dan Med Bull.* **46**, 263-268 (1999).
13. Beigel, J. H. *et al.* Remdesivir for the Treatment of Covid-19 — Preliminary Report. *N. Engl. J. Med.* NEJMoa2007764 (2020). doi:10.1056/NEJMoa2007764
14. Martins-Filho, P. R., Tavares, C. S. S. & Santos, V. S. Factors associated with mortality in patients with COVID-19. A quantitative evidence synthesis of clinical and laboratory data. *Eur. J. Intern. Med.* (2020). doi:10.1016/j.ejim.2020.04.043
15. Cecconi, M. *et al.* Early Predictors of Clinical Deterioration in a Cohort of 239 Patients Hospitalized for Covid-19 Infection in Lombardy, Italy. *J. Clin. Med.* **9**, 1548 (2020).
16. Henry, B. M., De Oliveira, M. H. S., Benoit, S., Plebani, M. & Lippi, G. Hematologic, biochemical and immune biomarker abnormalities associated with severe illness and mortality in coronavirus disease 2019 (COVID-19): A meta-analysis. *Clinical Chemistry and Laboratory Medicine* (2020). doi:10.1515/cclm-2020-0369
17. Mehta, P. *et al.* COVID-19: consider cytokine storm syndromes and immunosuppression. *The Lancet* **395**, 1033–1034 (2020).

18. Samsudin, I. & Vasikaran, S. D. Clinical utility and measurement of procalcitonin. *Clinical Biochemist Reviews* **38**, 59–68 (2017).
19. Wang, L. *et al.* Coronavirus Disease 2019 in elderly patients: characteristics and prognostic factors based on 4-week follow-up. *J. Infect.* (2020). doi:10.1016/j.jinf.2020.03.019
20. Singer, M. *et al.* The third international consensus definitions for sepsis and septic shock (sepsis-3). *JAMA - Journal of the American Medical Association* **315**, 801–810 (2016).
21. Babapoor-Farrokhran, S. *et al.* Myocardial injury and COVID-19: Possible mechanisms. *Life Sci.* **253**, 117723 (2020).
22. Madjid, M., Safavi-Naeini, P., Solomon, S. D. & Vardeny, O. Potential Effects of Coronaviruses on the Cardiovascular System: A Review. *JAMA Cardiology* (2020). doi:10.1001/jamacardio.2020.1286
23. Magro, C. *et al.* Complement associated microvascular injury and thrombosis in the pathogenesis of severe COVID-19 infection: a report of five cases. *Transl. Res.* (2020). doi:10.1016/j.trsl.2020.04.007
24. Tang, N., Li, D., Wang, X. & Sun, Z. Abnormal coagulation parameters are associated with poor prognosis in patients with novel coronavirus pneumonia. *J. Thromb. Haemost.* **18**, 844–847 (2020).
25. Schmidt, M. *et al.* The Danish National Patient Registry: a review of content, data quality, and research potential. *Clin. Epidemiol.* **7**, 449 (2015).
26. Schmidt, M., Pedersen, L. & Sørensen, H. T. The Danish Civil Registration System as a tool in epidemiology. *European Journal of Epidemiology* **29**, 541–549 (2014).

## Tables

Table 1: Characteristics of patients with coronavirus disease 2019 for total cohort, and stratified by death/ICU admission (within 30-days of diagnosis).

|                                      | Total                 | No Death/ICU admission | Death/ICU admission    | p      |
|--------------------------------------|-----------------------|------------------------|------------------------|--------|
| <b>Characteristics</b>               | 1310                  | 958 (73.1)             | 352 (26.9)             |        |
| <b>Age, years (median [IQR])</b>     | 73.60 [60.50, 81.90]  | 71.15 [56.52, 79.80]   | 77.50 [70.18, 84.53]   | <0.001 |
| <b>Male sex, n (%)</b>               | 715 (54.6)            | 489 (51.0)             | 226 (64.2)             | <0.001 |
| <b>Prior comorbidities:</b>          |                       |                        |                        |        |
| <b>Ischemic stroke, n (%)</b>        | 96 ( 7.3)             | 63 ( 6.6)              | 33 ( 9.4)              | 0.094  |
| <b>Diabetes, n (%)</b>               | 221 (16.9)            | 145 (15.1)             | 76 (21.6)              | 0.008  |
| <b>Ischemic heart disease, n (%)</b> | 165 (12.6)            | 116 (12.1)             | 49 (13.9)              | 0.398  |
| <b>COPD, n (%)</b>                   | 135 (10.3)            | 86 ( 9.0)              | 49 (13.9)              | 0.010  |
| <b>Atrial fibrillation, n (%)</b>    | 212 (16.2)            | 132 (13.8)             | 80 (22.7)              | <0.001 |
| <b>Chronic kidney disease, n (%)</b> | 131 (10.0)            | 88 ( 9.2)              | 43 (12.2)              | 0.119  |
| <b>Hypertension, n (%)</b>           | 474 (36.2)            | 323 (33.7)             | 151 (42.9)             | 0.002  |
| <b>Cancer, n (%)</b>                 | 194 (14.8)            | 140 (14.6)             | 54 (15.3)              | 0.727  |
| <b>Heart failure, n (%)</b>          | 95 ( 7.3)             | 60 ( 6.3)              | 35 ( 9.9)              | 0.030  |
| <b>Prior medication</b>              |                       |                        |                        |        |
| <b>Glimepiride, n (%)</b>            | 245 (18.7)            | 164 (17.1)             | 81 (23.0)              | 0.017  |
| <b>Aspirin, n (%)</b>                | 174 (13.3)            | 111 (11.6)             | 63 (17.9)              | 0.004  |
| <b>NSAID, n (%)</b>                  | 140 (10.7)            | 103 (10.8)             | 37 (10.5)              | 1.000  |
| <b>Beta blocker, n (%)</b>           | 174 (13.3)            | 111 (11.6)             | 63 (17.9)              | 0.004  |
| <b>ACEi, n (%)</b>                   | 203 (15.5)            | 144 (15.0)             | 59 (16.8)              | 0.439  |
| <b>ARB, n (%)</b>                    | 463 (35.3)            | 323 (33.7)             | 140 (39.8)             | 0.044  |
| <b>Loop diuretic, n (%)</b>          | 217 (16.6)            | 138 (14.4)             | 79 (22.4)              | 0.001  |
| <b>Thiazide diuretic, n (%)</b>      | 116 ( 8.9)            | 87 ( 9.1)              | 29 ( 8.2)              | 0.742  |
| <b>CCB, n (%)</b>                    | 241 (18.4)            | 157 (16.4)             | 84 (23.9)              | 0.003  |
| <b>Spirolactones, n (%)</b>          | 69 ( 5.3)             | 41 ( 4.3)              | 28 ( 8.0)              | 0.012  |
| <b>Baseline laboratory values</b>    |                       |                        |                        |        |
| <b>CRP, n (%)</b>                    | 1256 (95.9)           | 906 (94.6)             | 350 (99.4)             | <0.001 |
| <b>Leucocytes, n (%)</b>             | 1300 (99.2)           | 952 (99.4)             | 348 (98.9)             | 0.472  |
| <b>eGFR, n (%)</b>                   | 915 (69.8)            | 619 (64.6)             | 296 (84.1)             | <0.001 |
| <b>Urea, n (%)</b>                   | 1067 (81.5)           | 781 (81.5)             | 286 (81.2)             | 0.936  |
| <b>ALAT, n (%)</b>                   | 1167 (89.1)           | 850 (88.7)             | 317 (90.1)             | 0.549  |
| <b>Ferritin, n (%)</b>               | 252 (19.2)            | 205 (21.4)             | 47 (13.4)              | 0.001  |
| <b>D-dimer, n (%)</b>                | 449 (34.3)            | 332 (34.7)             | 117 (33.2)             | 0.646  |
| <b>Troponin, n (%)</b>               | 258 (19.7)            | 197 (20.6)             | 61 (17.3)              | 0.210  |
| <b>Procalcitonin, n (%)</b>          | 249 (19.0)            | 164 (17.1)             | 85 (24.1)              | 0.005  |
| <b>CRP, mg/L (median [IQR])</b>      | 88.00 [43.00, 160.00] | 74.50 [35.25, 130.00]  | 131.00 [68.25, 218.00] | <0.001 |

1  
2  
3  
4  
5  
6  
7  
8  
9  
10  
11  
12  
13  
14  
15  
16  
17  
18  
19  
20  
21  
22  
23  
24  
25  
26  
27  
28  
29  
30  
31  
32  
33  
34  
35  
36  
37  
38  
39  
40  
41  
42  
43  
44  
45  
46  
47

|                                                                                                                                                                                                                                                                                                                                                              |                         |                         |                         |        |
|--------------------------------------------------------------------------------------------------------------------------------------------------------------------------------------------------------------------------------------------------------------------------------------------------------------------------------------------------------------|-------------------------|-------------------------|-------------------------|--------|
| <b>Leucocytes, 10E9/L (median [IQR])</b>                                                                                                                                                                                                                                                                                                                     | 7.40 [5.50, 10.20]      | 7.10 [5.30, 9.60]       | 8.40 [6.12, 11.90]      | <0.001 |
| <b>eGFR, mL/min/1.73m2 (median [IQR])</b>                                                                                                                                                                                                                                                                                                                    | 73.23 [56.39, 83.55]    | 74.80 [60.97, 84.17]    | 66.45 [48.43, 81.33]    | <0.001 |
| <b>Urea, mmol/L (median [IQR])</b>                                                                                                                                                                                                                                                                                                                           | 6.50 [4.60, 9.60]       | 5.90 [4.20, 8.30]       | 9.05 [6.60, 12.47]      | <0.001 |
| <b>ALAT, U/L (median [IQR])</b>                                                                                                                                                                                                                                                                                                                              | 31.00 [21.00, 52.00]    | 31.00 [21.00, 51.00]    | 32.00 [22.00, 53.00]    | 0.169  |
| <b>Ferritin, µg/L (median [IQR])</b>                                                                                                                                                                                                                                                                                                                         | 266.00 [143.00, 446.75] | 264.00 [130.00, 439.00] | 311.00 [189.50, 464.00] | 0.110  |
| <b>D-dimer, mg/L (median [IQR])</b>                                                                                                                                                                                                                                                                                                                          | 0.94 [0.55, 1.80]       | 0.86 [0.51, 1.63]       | 1.40 [0.77, 2.40]       | <0.001 |
| <b>Troponin ratio (median [IQR])</b>                                                                                                                                                                                                                                                                                                                         | 1.00 [0.57, 1.79]       | 0.92 [0.39, 1.34]       | 2.14 [1.29, 3.43]       | <0.001 |
| <b>Procalcitonin, µg/L (median [IQR])</b>                                                                                                                                                                                                                                                                                                                    | 0.20 [0.11, 0.49]       | 0.15 [0.08, 0.28]       | 0.40 [0.20, 0.92]       | <0.001 |
| ACEi, angiotensin-converting enzyme inhibitor; ALAT, alanintransaminase; ARB, angiotensin receptor blocker; CCB, calcium channel blocker; COPD, chronic obstructive pulmonary disease; CRP, C-reactive protein; eGFR, estimated glomerular filtration rate; ICU, intensive care unit; IQR, inter-quartile range; NSAID, nonsteroidal anti-inflammatory drug. |                         |                         |                         |        |

For peer review only

1  
2  
3 Figure caption:  
4

5 Figure 1: Flowchart of study cohort.  
6  
7

8  
9 Figure 2: 30-day absolute risk for the composite outcome of death or ICU admission, adjusted for age and gender.  
10

11  
12 Figure 3: 30-day absolute risk for the composite outcome of death or ICU admission, stratified by normal/elevated ranges, and  
13 adjusted for age and gender.  
14  
15

16  
17 Figure 4: 30-day absolute risk for the composite outcome of death or ICU admission, adjusted for CRP level, age, gender, diabetes,  
18 chronic obstructive pulmonary disease, hypertension and ischemic heart disease.  
19  
20

21  
22  
23  
24 Figure S1: 30-day absolute risk of death, adjusted for age and gender.  
25  
26

27  
28 Figure S2: 30-day absolute risk of death, stratified by normal/elevated ranges, and adjusted for age and gender.  
29  
30  
31  
32  
33  
34  
35  
36  
37  
38  
39  
40  
41  
42  
43  
44  
45  
46  
47



Figure 1: Flowchart of study cohort

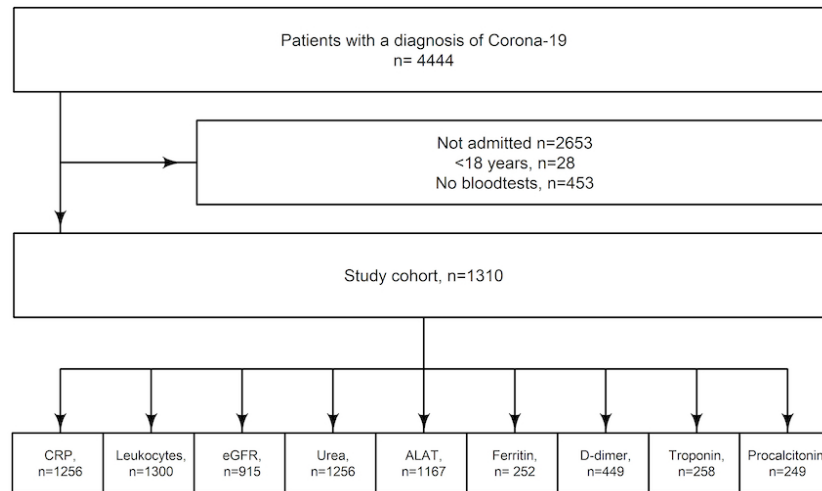

Legend: ALAT, alanintransaminase; CRP, C-reactive protein; eGFR, estimated glomerular filtration rate.

Figure 1: Flowchart of study cohortLegend: ALAT, alanintransaminase; CRP, C-reactive protein; eGFR, estimated glomerular filtration rate.

86x51mm (300 x 300 DPI)

Figure 2: 30-day absolute risk for the composite outcome of death or ICU admission, adjusted for age and

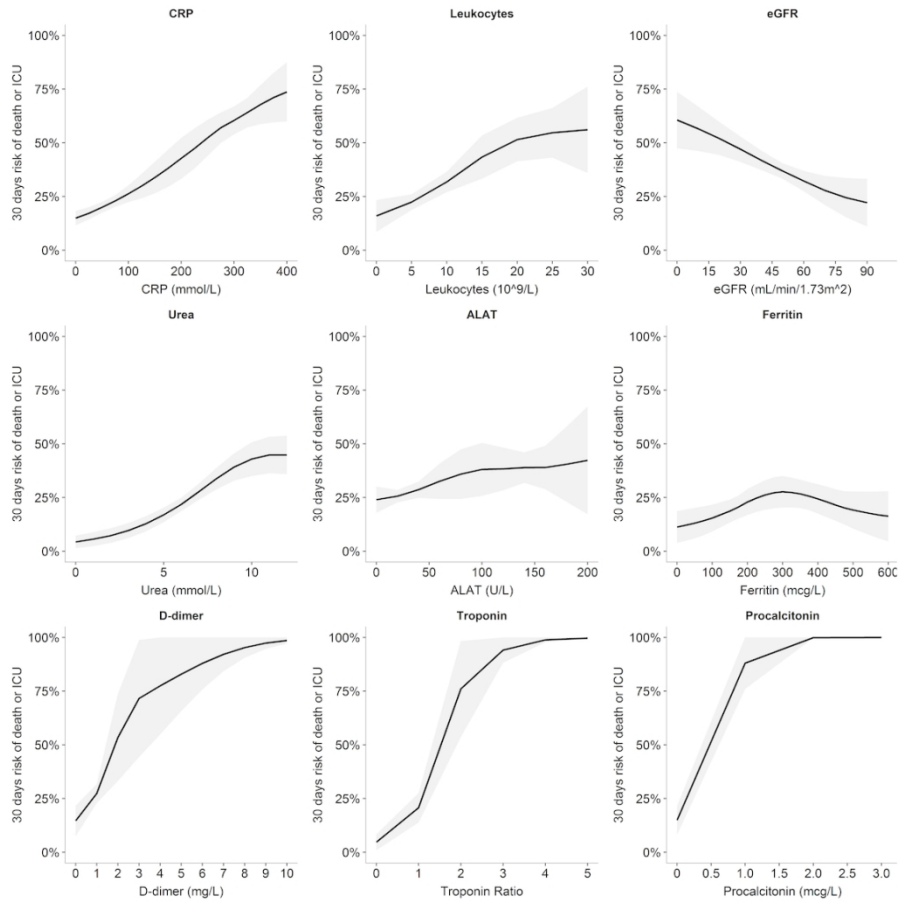

Legend: ALAT, alanintransaminase; CRP, C-reactive protein; eGFR, estimated glomerular filtration rate; ICU, intensive care unit.

Figure 2: 30-day absolute risk for the composite outcome of death or ICU admission, adjusted for age and gender. Legend: ALAT, alanintransaminase; CRP, C-reactive protein; eGFR, estimated glomerular filtration rate; ICU, intensive care unit.

108x108mm (300 x 300 DPI)

**Figure 3: 30-day absolute risk for the composite outcome of death or ICU admission, stratified by normal/elevated ranges, and adjusted for age and gender.**

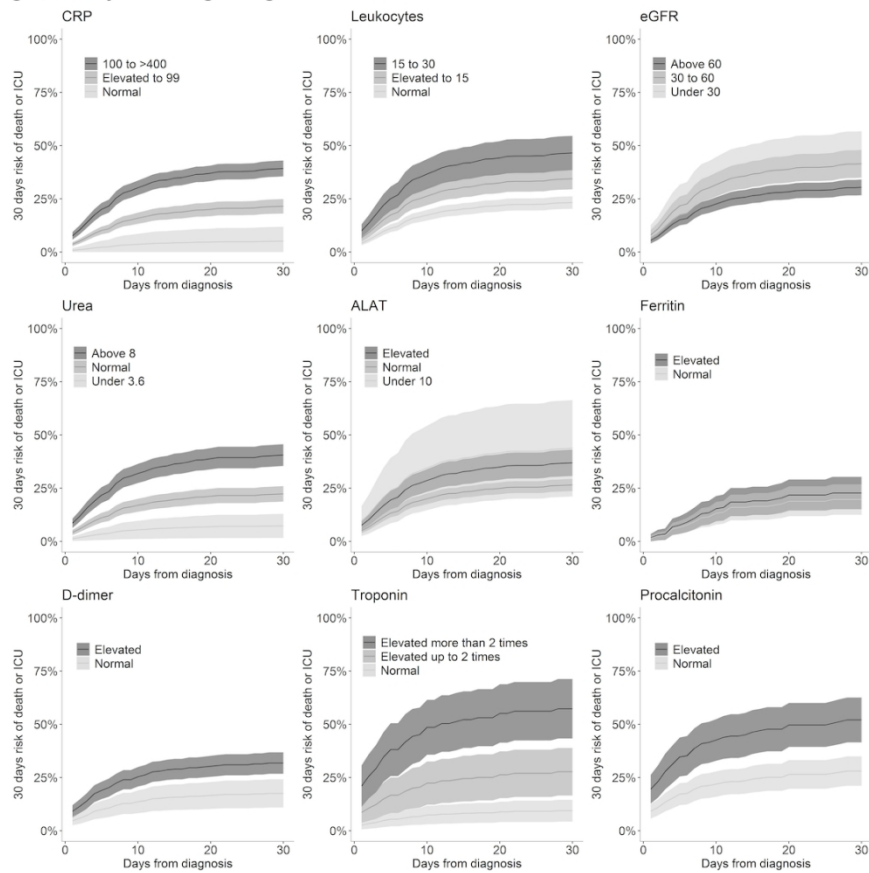

Legend: ALAT, alanintransaminase; CRP, C-reactive protein; eGFR, estimated glomerular filtration rate; ICU, intensive care unit.

**Figure 3: 30-day absolute risk for the composite outcome of death or ICU admission, stratified by normal/elevated ranges, and adjusted for age and gender. Legend: ALAT, alanintransaminase; CRP, C-reactive protein; eGFR, estimated glomerular filtration rate; ICU, intensive care unit.**

108x108mm (300 x 300 DPI)

Figure 4: 30-day absolute risk for the composite outcome of death or ICU admission, adjusted for CRP level, age, gender, diabetes, chronic obstructive pulmonary disease, hypertension and ischemic heart disease.

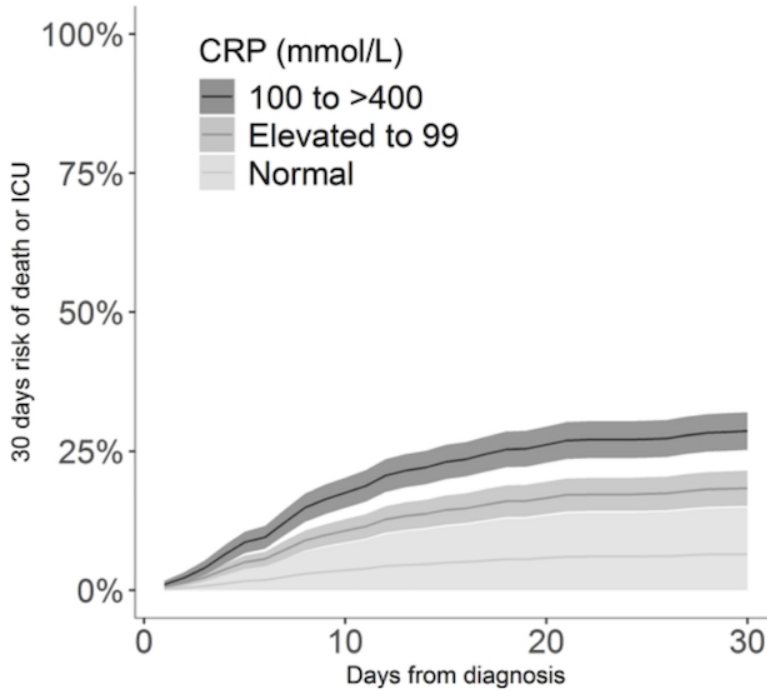

Legend: CRP, C-reactive protein; ICU, intensive care unit.

Figure 4: 30-day absolute risk for the composite outcome of death or ICU admission, adjusted for CRP level, age, gender, diabetes, chronic obstructive pulmonary disease, hypertension and ischemic heart disease.  
 Legend: CRP, C-reactive protein; ICU, intensive care unit.

67x60mm (300 x 300 DPI)

**Figure S1: 30-day absolute risk of death, adjusted for age and gender.**

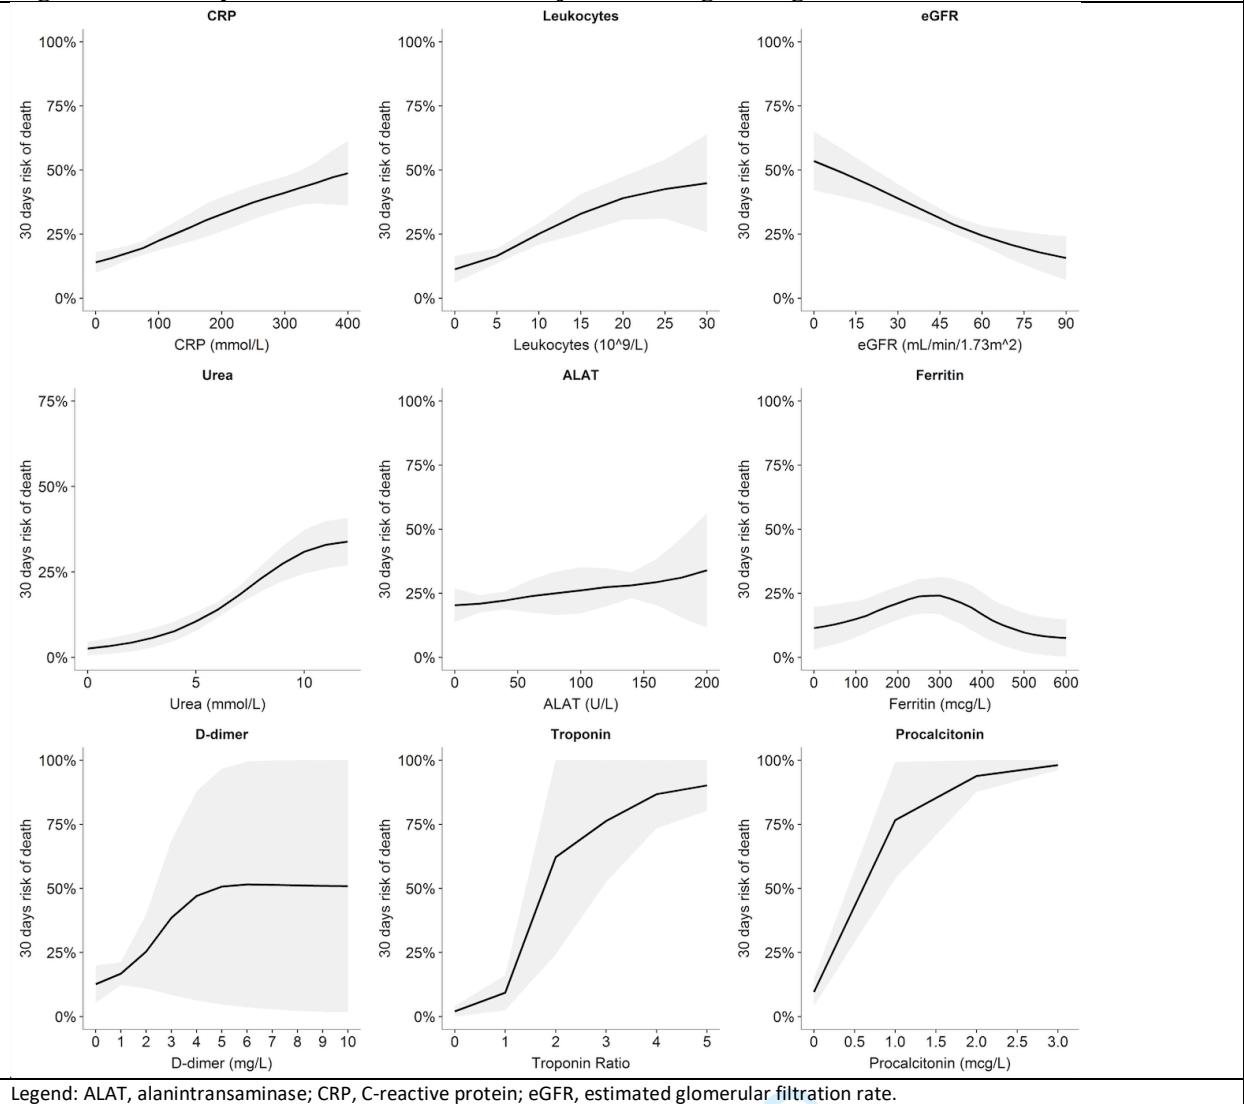

**Figure S2: 30-day absolute risk of death, stratified by normal/elevated ranges, and adjusted for age and gender.**

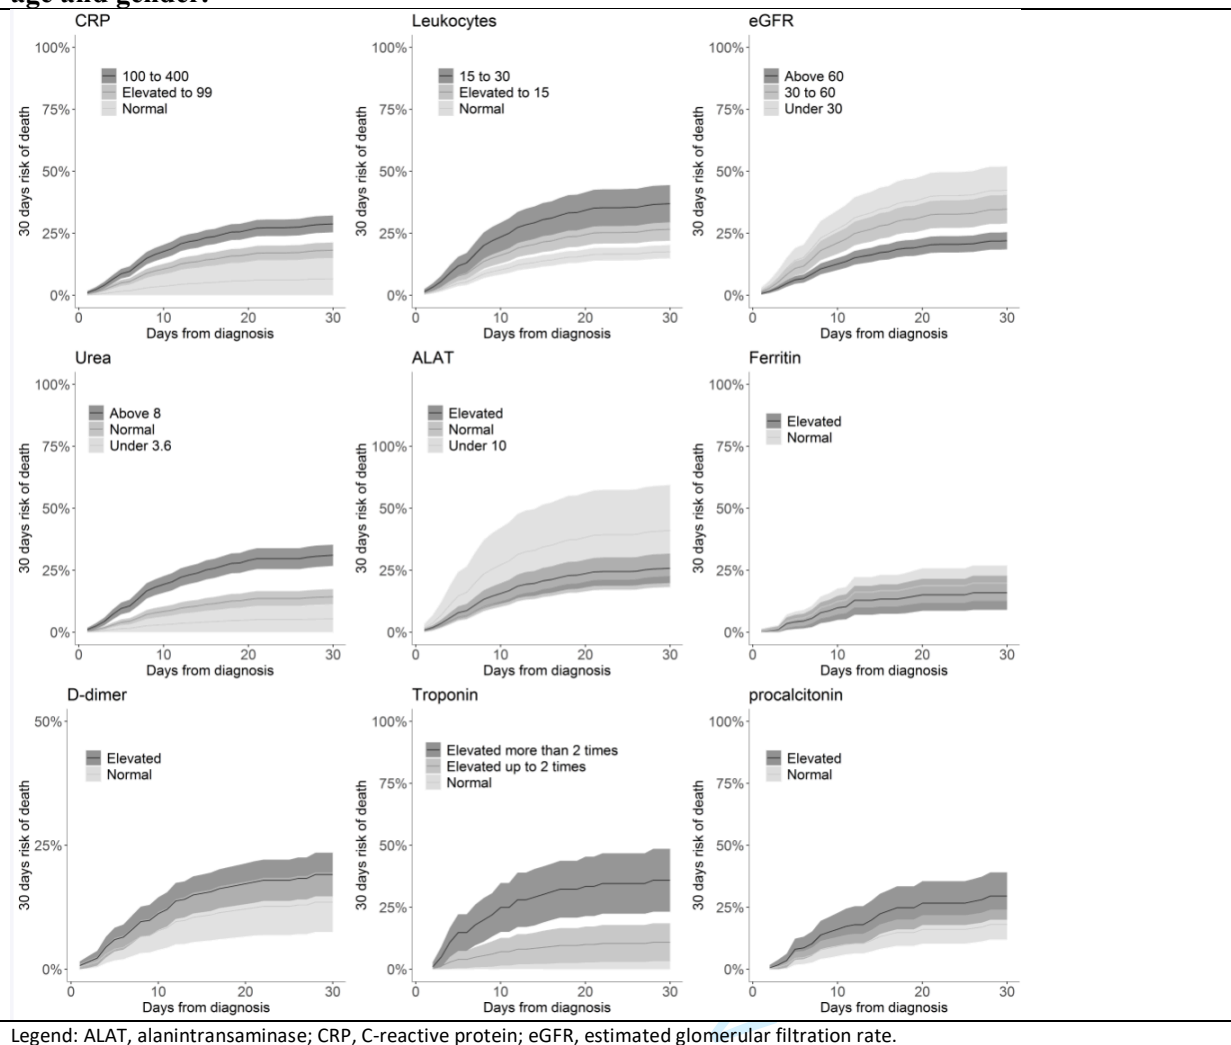

Only

**Table S1: Characteristics of patients with coronavirus disease 2019 for total cohort, survivors and non-survivors (within 30-days of diagnosis).**

|                                     | Total                   | Survivors               | Non-survivors           | p      |
|-------------------------------------|-------------------------|-------------------------|-------------------------|--------|
| Characteristics                     | 1310                    | 1047 (79.9%)            | 263 (20.1%)             |        |
| Age, years (median [IQR])           | 73.60 [60.50, 81.90]    | 70.60 [56.55, 79.40]    | 81.40 [74.10, 86.05]    | <0.001 |
| Male sex, n (%)                     | 715 (54.6)              | 552 (52.7)              | 163 (62.0)              | 0.008  |
| Prior ischemic stroke, n (%)        | 96 ( 7.3)               | 66 ( 6.3)               | 30 (11.4)               | 0.008  |
| Prior diabetes, n (%)               | 221 (16.9)              | 161 (15.4)              | 60 (22.8)               | 0.006  |
| Prior ischemic heart disease, n (%) | 165 (12.6)              | 128 (12.2)              | 37 (14.1)               | 0.407  |
| Prior COPD, n (%)                   | 135 (10.3)              | 93 ( 8.9)               | 42 (16.0)               | 0.001  |
| Prior atrial fibrillation, n (%)    | 212 (16.2)              | 139 (13.3)              | 73 (27.8)               | <0.001 |
| Prior chronic kidney disease, n (%) | 131 (10.0)              | 94 ( 9.0)               | 37 (14.1)               | 0.021  |
| Prior hypertension, n (%)           | 474 (36.2)              | 358 (34.2)              | 116 (44.1)              | 0.003  |
| Prior cancer, n (%)                 | 194 (14.8)              | 149 (14.2)              | 45 (17.1)               | 0.245  |
| Heart failure, n (%)                | 95 ( 7.3)               | 61 ( 5.8)               | 34 (12.9)               | <0.001 |
| Glimepiride, n (%)                  | 245 (18.7)              | 184 (17.6)              | 61 (23.2)               | 0.042  |
| Aspirin, n (%)                      | 174 (13.3)              | 122 (11.7)              | 52 (19.8)               | 0.001  |
| NSAID, n (%)                        | 140 (10.7)              | 115 (11.0)              | 25 ( 9.5)               | 0.577  |
| Beta blocker, n (%)                 | 174 (13.3)              | 122 (11.7)              | 52 (19.8)               | 0.001  |
| ACEi, n (%)                         | 203 (15.5)              | 158 (15.1)              | 45 (17.1)               | 0.446  |
| ARB, n (%)                          | 463 (35.3)              | 361 (34.5)              | 102 (38.8)              | 0.195  |
| Loop diuretic, n (%)                | 217 (16.6)              | 146 (13.9)              | 71 (27.0)               | <0.001 |
| Thiazide diuretic, n (%)            | 116 ( 8.9)              | 94 ( 9.0)               | 22 ( 8.4)               | 0.809  |
| CCB, n (%)                          | 241 (18.4)              | 186 (17.8)              | 55 (20.9)               | 0.248  |
| Spirolactones = 1 (%)               | 69 ( 5.3)               | 45 ( 4.3)               | 24 ( 9.1)               | 0.003  |
| CRP, n (%)                          | 1256 (95.9)             | 994 (94.9)              | 262 (99.6)              | <0.001 |
| Leucocytes, n (%)                   | 1300 (99.2)             | 1041 (99.4)             | 259 (98.5)              | 0.121  |
| eGFR, n (%)                         | 915 (69.8)              | 693 (66.2)              | 222 (84.4)              | <0.001 |
| Urea, n (%)                         | 1067 (81.5)             | 861 (82.2)              | 206 (78.3)              | 0.156  |
| ALAT, n (%)                         | 1167 (89.1)             | 936 (89.4)              | 231 (87.8)              | 0.507  |
| Ferritin, n (%)                     | 252 (19.2)              | 213 (20.3)              | 39 (14.8)               | 0.044  |
| D-dimer, n (%)                      | 449 (34.3)              | 380 (36.3)              | 69 (26.2)               | 0.002  |
| Troponin, n (%)                     | 258 (19.7)              | 223 (21.3)              | 35 (13.3)               | 0.003  |
| Procalcitonin, n (%)                | 249 (19.0)              | 200 (19.1)              | 49 (18.6)               | 0.930  |
| CRP, mg/L (median [IQR])            | 88.00 [43.00, 160.00]   | 80.00 [38.00, 143.00]   | 122.50 [61.25, 210.00]  | <0.001 |
| Leucocytes, 10E9/L (median [IQR])   | 7.40 [5.50, 10.20]      | 7.20 [5.31, 9.70]       | 8.50 [6.16, 12.05]      | <0.001 |
| eGFR, mL/min/1.73m2 (median [IQR])  | 73.23 [56.39, 83.55]    | 74.94 [61.40, 84.27]    | 62.23 [45.46, 77.93]    | <0.001 |
| Urea, mmol/L (median [IQR])         | 6.50 [4.60, 9.60]       | 6.00 [4.20, 8.40]       | 9.80 [7.32, 13.23]      | <0.001 |
| ALAT, U/L (median [IQR])            | 31.00 [21.00, 52.00]    | 31.50 [21.00, 52.00]    | 30.00 [20.00, 47.00]    | 0.177  |
| Ferritin, µg/L (median [IQR])       | 266.00 [143.00, 446.75] | 266.00 [130.00, 449.00] | 260.00 [182.50, 388.50] | 0.806  |

|                                                                                                                                                                                                                                                                                                                                                             |                   |                   |                   |        |
|-------------------------------------------------------------------------------------------------------------------------------------------------------------------------------------------------------------------------------------------------------------------------------------------------------------------------------------------------------------|-------------------|-------------------|-------------------|--------|
| <b>D-dimer, mg/L (median [IQR])</b>                                                                                                                                                                                                                                                                                                                         | 0.94 [0.55, 1.80] | 0.90 [0.54, 1.66] | 1.40 [0.73, 2.80] | 0.001  |
| <b>Troponin ratio (median [IQR])</b>                                                                                                                                                                                                                                                                                                                        | 1.00 [0.57, 1.79] | 0.93 [0.45, 1.50] | 2.86 [1.82, 4.11] | <0.001 |
| <b>Procalcitonin, µg/L (median [IQR])</b>                                                                                                                                                                                                                                                                                                                   | 0.20 [0.11, 0.49] | 0.18 [0.10, 0.40] | 0.36 [0.19, 0.92] | <0.001 |
| ACEi, angiotensin-converting enzyme inhibitor; ALAT, alanintransaminase; ARB, angiotensin receptor blocker; CCB, calcium channel blocker; COPD, chronic obstructive pulmonary disease; CRP, C-reactive protein; eGFR, estimated glomerular filtration rate; ICU, intensive care unit; IQR, inter-quartile range; NSAID, nonsteroidal anti-inflammatory drug |                   |                   |                   |        |

For peer review only



1  
2  
3  
4  
5  
6  
7  
8  
9  
10  
11  
12  
13  
14  
15  
16  
17  
18  
19  
20  
21  
22  
23  
24  
25  
26  
27  
28  
29  
30  
31  
32  
33  
34  
35  
36  
37  
38  
39  
40  
41  
42  
43  
44  
45  
46

For peer review only

Table S2: Characteristics of all patients with coronavirus disease 2019 (admitted and not-admitted) stratified by those with or without recorded biochemistry data.

|                                                                                | No biochemistry data        | Biochemistry data           | p                |
|--------------------------------------------------------------------------------|-----------------------------|-----------------------------|------------------|
| <b>Characteristics</b>                                                         | <b>2683 (62.0%)</b>         | <b>1647 (38.0%)</b>         |                  |
| <b>Age, years (median [IQR])</b>                                               | <b>47.50 [36.10, 58.50]</b> | <b>72.20 [58.15, 80.95]</b> | <b>&lt;0.001</b> |
| <b>Male sex, n (%)</b>                                                         | <b>1181 (44.0)</b>          | <b>898 (54.5)</b>           | <b>&lt;0.001</b> |
| <b><i>Prior comorbidities:</i></b>                                             |                             |                             |                  |
| <b>Ischemic stroke, n (%)</b>                                                  | <b>41 ( 1.5)</b>            | <b>115 ( 7.0)</b>           | <b>&lt;0.001</b> |
| <b>Diabetes, n (%)</b>                                                         | <b>97 ( 3.6)</b>            | <b>261 (15.8)</b>           | <b>&lt;0.001</b> |
| <b>Ischemic heart disease, n (%)</b>                                           | <b>91 ( 3.4)</b>            | <b>189 (11.5)</b>           | <b>&lt;0.001</b> |
| <b>COPD, n (%)</b>                                                             | <b>57 ( 2.1)</b>            | <b>164 (10.0)</b>           | <b>&lt;0.001</b> |
| <b>Atrial fibrillation, n (%)</b>                                              | <b>95 ( 3.5)</b>            | <b>253 (15.4)</b>           | <b>&lt;0.001</b> |
| <b>Chronic kidney disease, n (%)</b>                                           | <b>89 ( 3.3)</b>            | <b>168 (10.2)</b>           | <b>&lt;0.001</b> |
| <b>Hypertension, n (%)</b>                                                     | <b>274 (10.2)</b>           | <b>575 (34.9)</b>           | <b>&lt;0.001</b> |
| <b>Cancer, n (%)</b>                                                           | <b>123 ( 4.6)</b>           | <b>243 (14.8)</b>           | <b>&lt;0.001</b> |
| <b>Heart failure, n (%)</b>                                                    | <b>42 ( 1.6)</b>            | <b>118 ( 7.2)</b>           | <b>&lt;0.001</b> |
| <b>COPD, chronic obstructive pulmonary disease; IQR, inter-quartile range.</b> |                             |                             |                  |

Table S3: Multivariable Cox regression analysis for the composite outcome of death or ICU admission, adjusted for CRP level, age, gender, diabetes, chronic obstructive pulmonary disease, hypertension and ischemic heart disease. Legend: CRP, C-reactive protein; ICU, intensive care unit.

| Variable                  | Hazard ratio (95% CI) | p      |
|---------------------------|-----------------------|--------|
| CRP 100-400 mmol/L        | 10.32 (2.56 – 41.61)  | 0.001  |
| CRP elevated to 99 mmol/L | 4.89 (1.21-19.81)     | 0.026  |
| Age, years                | 1.04 (1.03-1.05)      | <0.001 |
| Male sex                  | 1.54 (1.23-1.93)      | <0.001 |
| Hypertension              | 1.01 (0.81-1.26)      | 0.924  |
| Ischemic heart disease    | 0.91 (0.66-1.24)      | 0.533  |
| COPD                      | 1.26 (0.93-1.71)      | 0.142  |
| Diabetes                  | 1.25 (0.97-1.62)      | 0.087  |

CI, confidence interval; COPD, chronic obstructive pulmonary disease; IQR, inter-quartile range.

**STROBE 2007 (v4) Statement—Checklist of items that should be included in reports of *cohort studies***

| Section/Topic                | Item # | Recommendation                                                                                                                                                                       | Reported on page # |
|------------------------------|--------|--------------------------------------------------------------------------------------------------------------------------------------------------------------------------------------|--------------------|
| <b>Title and abstract</b>    | 1      | (a) Indicate the study's design with a commonly used term in the title or the abstract                                                                                               | 1                  |
|                              |        | (b) Provide in the abstract an informative and balanced summary of what was done and what was found                                                                                  | 3                  |
| <b>Introduction</b>          |        |                                                                                                                                                                                      |                    |
| Background/rationale         | 2      | Explain the scientific background and rationale for the investigation being reported                                                                                                 | 5-6                |
| Objectives                   | 3      | State specific objectives, including any prespecified hypotheses                                                                                                                     | 6                  |
| <b>Methods</b>               |        |                                                                                                                                                                                      |                    |
| Study design                 | 4      | Present key elements of study design early in the paper                                                                                                                              | 6-7                |
| Setting                      | 5      | Describe the setting, locations, and relevant dates, including periods of recruitment, exposure, follow-up, and data collection                                                      | 6-7                |
| Participants                 | 6      | (a) Give the eligibility criteria, and the sources and methods of selection of participants. Describe methods of follow-up                                                           | 6-7                |
|                              |        | (b) For matched studies, give matching criteria and number of exposed and unexposed                                                                                                  |                    |
| Variables                    | 7      | Clearly define all outcomes, exposures, predictors, potential confounders, and effect modifiers. Give diagnostic criteria, if applicable                                             | 7-8                |
| Data sources/<br>measurement | 8*     | For each variable of interest, give sources of data and details of methods of assessment (measurement). Describe comparability of assessment methods if there is more than one group | 6-8                |
| Bias                         | 9      | Describe any efforts to address potential sources of bias                                                                                                                            | 7                  |
| Study size                   | 10     | Explain how the study size was arrived at                                                                                                                                            | 7                  |
| Quantitative variables       | 11     | Explain how quantitative variables were handled in the analyses. If applicable, describe which groupings were chosen and why                                                         | 7-8                |
| Statistical methods          | 12     | (a) Describe all statistical methods, including those used to control for confounding                                                                                                | 7-8                |
|                              |        | (b) Describe any methods used to examine subgroups and interactions                                                                                                                  | 7                  |
|                              |        | (c) Explain how missing data were addressed                                                                                                                                          | 7-8                |
|                              |        | (d) If applicable, explain how loss to follow-up was addressed                                                                                                                       | N/A                |
|                              |        | (e) Describe any sensitivity analyses                                                                                                                                                | N/A                |
| <b>Results</b>               |        |                                                                                                                                                                                      |                    |

|                          |     |                                                                                                                                                                                                              |                    |
|--------------------------|-----|--------------------------------------------------------------------------------------------------------------------------------------------------------------------------------------------------------------|--------------------|
| Participants             | 13* | (a) Report numbers of individuals at each stage of study—eg numbers potentially eligible, examined for eligibility, confirmed eligible, included in the study, completing follow-up, and analysed            | 8                  |
|                          |     | (b) Give reasons for non-participation at each stage                                                                                                                                                         | 7-8                |
|                          |     | (c) Consider use of a flow diagram                                                                                                                                                                           | Figure 1           |
| Descriptive data         | 14* | (a) Give characteristics of study participants (eg demographic, clinical, social) and information on exposures and potential confounders                                                                     | 8-9                |
|                          |     | (b) Indicate number of participants with missing data for each variable of interest                                                                                                                          | 9-14               |
|                          |     | (c) Summarise follow-up time (eg, average and total amount)                                                                                                                                                  | 9-14               |
| Outcome data             | 15* | Report numbers of outcome events or summary measures over time                                                                                                                                               | 8                  |
| Main results             | 16  | (a) Give unadjusted estimates and, if applicable, confounder-adjusted estimates and their precision (eg, 95% confidence interval). Make clear which confounders were adjusted for and why they were included | 9-14               |
|                          |     | (b) Report category boundaries when continuous variables were categorized                                                                                                                                    | 9-14               |
|                          |     | (c) If relevant, consider translating estimates of relative risk into absolute risk for a meaningful time period                                                                                             |                    |
| Other analyses           | 17  | Report other analyses done—eg analyses of subgroups and interactions, and sensitivity analyses                                                                                                               | 9-14, supplemental |
| <b>Discussion</b>        |     |                                                                                                                                                                                                              |                    |
| Key results              | 18  | Summarise key results with reference to study objectives                                                                                                                                                     | 14-18              |
| <b>Limitations</b>       |     |                                                                                                                                                                                                              |                    |
| Interpretation           | 20  | Give a cautious overall interpretation of results considering objectives, limitations, multiplicity of analyses, results from similar studies, and other relevant evidence                                   | 14-18              |
| Generalisability         | 21  | Discuss the generalisability (external validity) of the study results                                                                                                                                        | 18                 |
| <b>Other information</b> |     |                                                                                                                                                                                                              |                    |
| Funding                  | 22  | Give the source of funding and the role of the funders for the present study and, if applicable, for the original study on which the present article is based                                                | 5                  |

\*Give information separately for cases and controls in case-control studies and, if applicable, for exposed and unexposed groups in cohort and cross-sectional studies.

**Note:** An Explanation and Elaboration article discusses each checklist item and gives methodological background and published examples of transparent reporting. The STROBE checklist is best used in conjunction with this article (freely available on the Web sites of PLoS Medicine at <http://www.plosmedicine.org/>, Annals of Internal Medicine at <http://www.annals.org/>, and Epidemiology at <http://www.epidem.com/>). Information on the STROBE Initiative is available at [www.strobe-statement.org](http://www.strobe-statement.org).
